# Supplementary material for: Replication fork integrity and intra-S phase checkpoint suppress gene amplification
Source: PubMed Central journal article supplement (PMC4357702; doi:10.1093/nar/gkv084), 2015-02-11
Supplement: supp_gkv084_nar-03028-d-2014-File008.pdf [file supp_gkv084_nar-03028-d-2014-File008.pdf]

Kondratova et al., - Replication fork protection and intra-S phase checkpoint suppress gene amplification

## Supplementary Materials Table of Contents

### Supplementary Methods

Supplementary figure 1 – Ongoing chromosome instability in Mre11-KD cells

Supplementary figure 2 – Intrachromosomal *DHFR* amplification (Fluorescence *in situ* hybridization)

Supplementary figure 3 – Tetraploidization does not precede gene amplification (chromosome count)

Supplementary figure 4 – Endogenous DNA breaks during replication (Comet assay)

Supplementary figure 5 – Checkpoint abrogation increases broken DNA in Mre11-KD cells (Pulse-Field Gel Electrophoresis)

Supplementary table 1 – The number of MTX-resistant colonies from 5 genotypes

Supplementary table 2 – The number of MTX-resistant colonies from fluctuation tests

Supplementary table 3 – The number of I-SceI induced MTX-resistant colonies

Supplementary table 4 – Gene ontology analysis for the differentially expressed genes (with gene lists)

Supplementary table 5 – The list of differentially expressed genes between Mre11-KD cells and control cells.

## **Supplementary methods**

### **Growth curves and drug sensitivity**

To obtain growth curves,  $1 \times 10^5$  cells were plated in triplicates for each time point in 6-well plates; each day cells were trypsinized and counted in triplicates. For drug sensitivity assays, cells were plated in triplicates in 96-well plates ( $2 \times 10^3$  cells/well) and were treated with serial dilutions of either etoposide (starting concentration 5 $\mu$ M) or hydroxyurea (starting concentration 500 $\mu$ M). For sensitivity of cells to Holliday Junction-binding peptide wrwycr, cells were treated with serial dilutions of the peptide (starting concentration 40  $\mu$ M) for 24h or 72h; cells treated for 24h were allowed to grow for additional 48h in drug-free medium before analysis. Cell viability was assessed using CellTiter-Blue® Cell Viability Assay (Promega).

### **Nuclear morphology**

Nuclear morphology was studied in cells that were fixed with 4% formaldehyde and were stained with 100 $\mu$ g/ml DAPI (Molecular Probes, #D1306). Nuclei were observed by the fluorescent microscope equipped with digital camera; pictures were taken at either 20x, 40x or 63x magnification using Q-Capture Pro7 software. Nuclear sizes were analyzed using ImageJ software. For each DAPI-stained nucleus, integrated intensity of fluorescence was measured.

### ***DHFR* copy number analyses**

*DHFR* copy number was measured using quantitative real time PCR using Light Cycler 480 (Roche, Indianapolis, IN, USA). Genomic DNA was extracted from cells as described

previously. Briefly, cells were incubated in the lysis buffer (100mM NaCl/10mM Tris·HCl, pH 8.0/25mM EDTA/0.5%SDS/proteinase K) for 24 hours at 37°C, followed by phenol/chloroform extraction and ethanol precipitation. PCR primers were designed for *DHFR* cDNA in the transgene and copy numbers were normalized to the internal control Chinese hamster *p53*. PCR reactions were carried out in a three-step 40-cycle reaction of 95°C for 30 seconds, 60°C for 3 seconds, and 72°C for 30 seconds by using iQ SYBR Green Supermix (Bio-Rad, Hercules, CA, USA). We used 5 ng/μl of genomic DNA for each reaction.

Southern blotting was done as described previously (references 8,9). 2μg of genomic DNA was digested with *PstI* and *NheI*, run on a 0.8% agarose gel and transferred onto nylon membrane. Probes (*DHFR* cDNA and Chinese hamster *p53*) were labeled with <sup>32</sup>P and co-hybridized to the membranes.

## Supplementary figure 1 - Ongoing chromosome instability in Mre11-KD cells

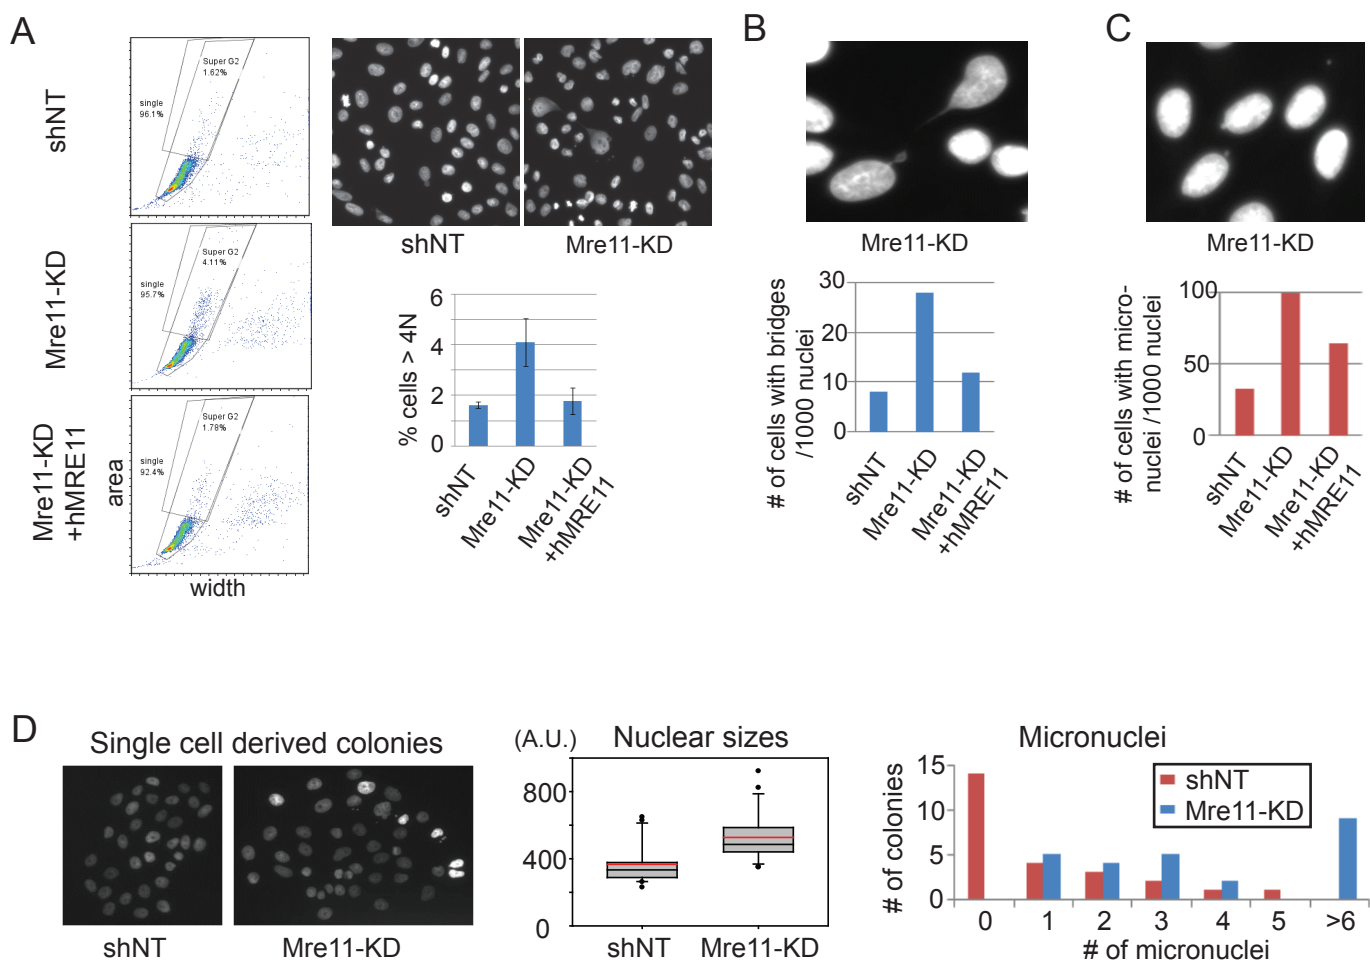

**A.** Cells with >4N DNA contents were increased in Mre11-KD cells. FACS profiles (left), nuclear morphology (nuclei stained with DAPI) (top) and a histogram for the fractions of cells with >4N DNA contents are shown. Sub-G1 cells would accumulate at the left-bottom corner of the diagrams.

**B** and **C.** The number of nuclei with chromatin bridges (**E**) and micronuclei (**F**) / 1000 nuclei. Nuclei stained with DAPI in Mre11-KD cells are shown on the top.

**D.** Ongoing chromosome instability in Mre11-KD cells. Left, colonies derived from single cells were isolated, fixed and stained with DAPI. Middle, average nuclear size (measured as integrated intensity of DAPI staining) within each colony. Right, for each colony, the number of micronuclei was counted.

## Supplementary figure 2 - Intrachromosomal DHFR amplification

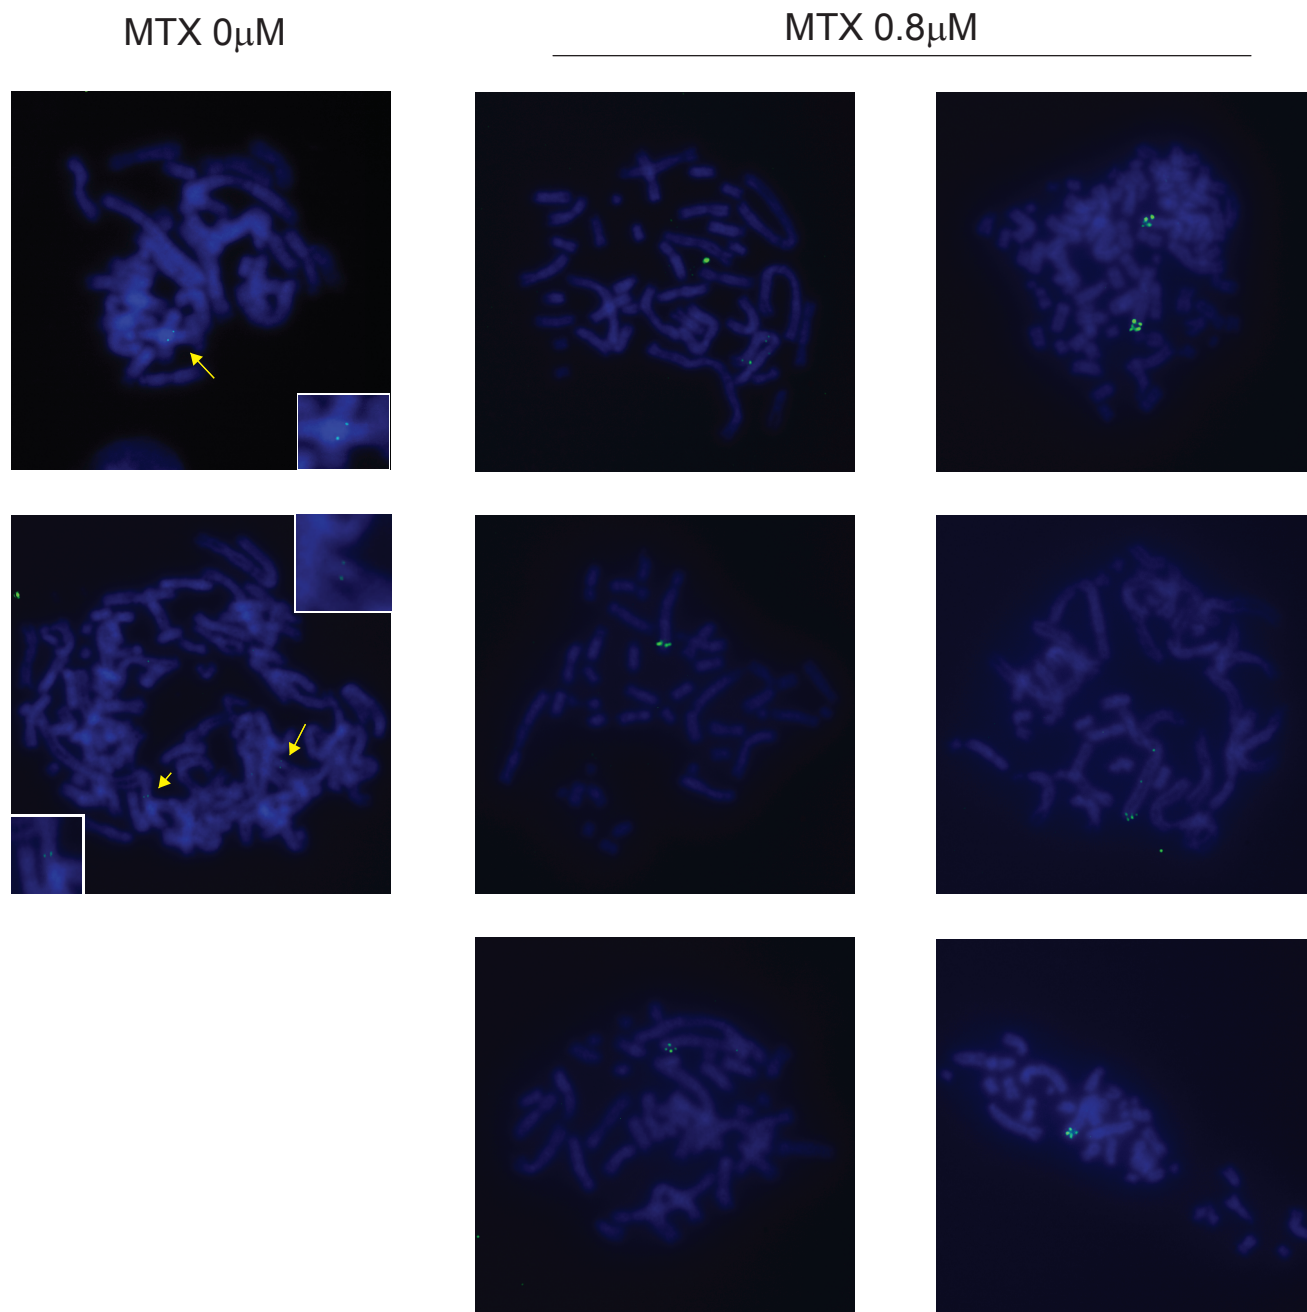

Fluorescence *in situ* hybridization of parental (left) and MTX-resistant (right) Mre11-KD cells. Note that both the numbers and fluorescence signal intensities are higher in MTX-resistant cells than parental cells.

## Supplementary figure 3 – Chromosome count

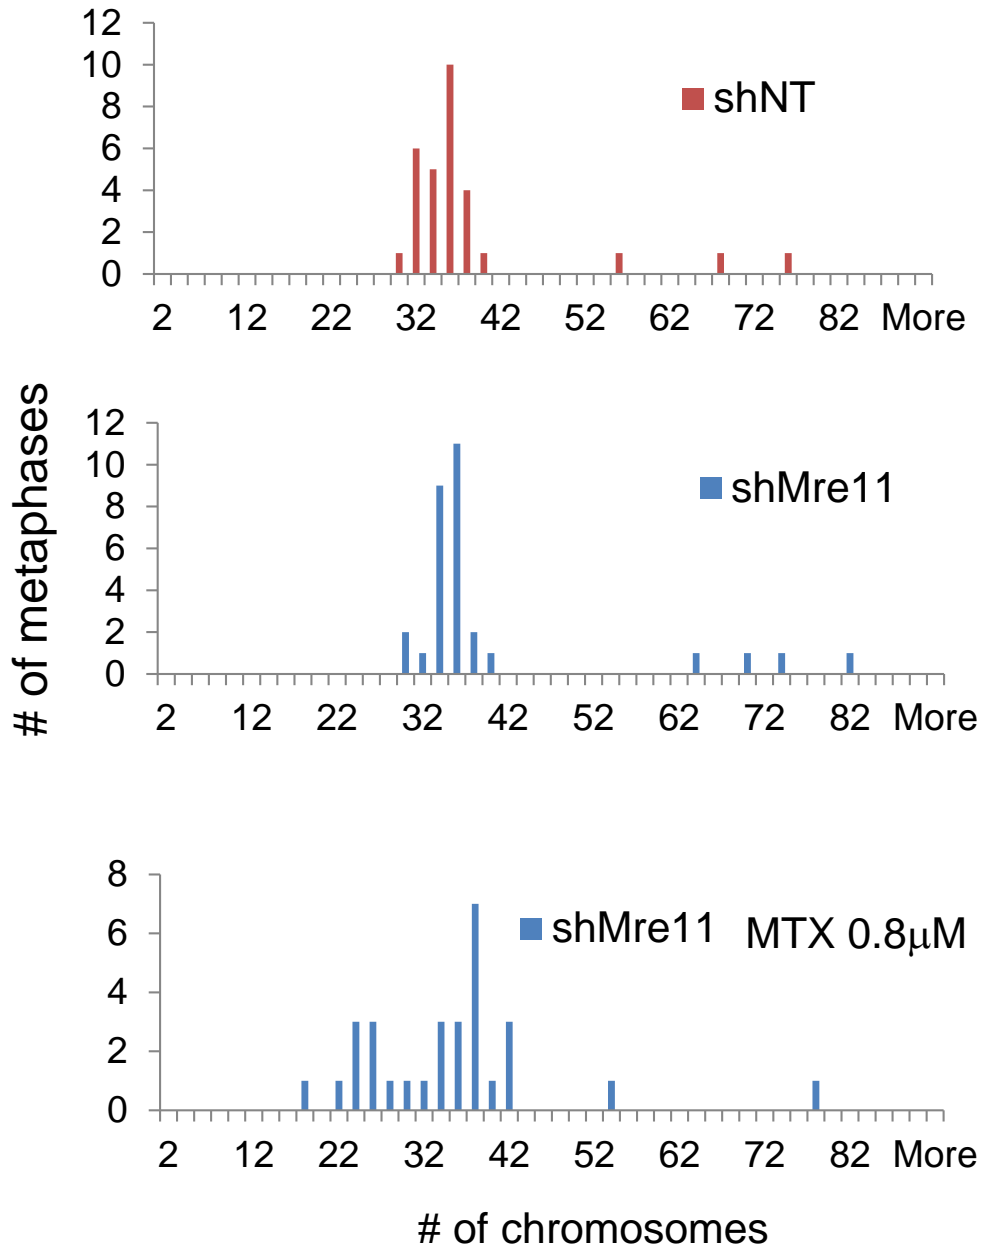

Tetraploidy unlikely precedes gene amplification. The number of chromosomes were counted from each genotype (30 metaphases each) and are shown in the histograms. Note that chromosome loss, but not gain was evident in MTX-resistant cells.

## Supplementary figure 4 - Endogenous DNA breaks during replication

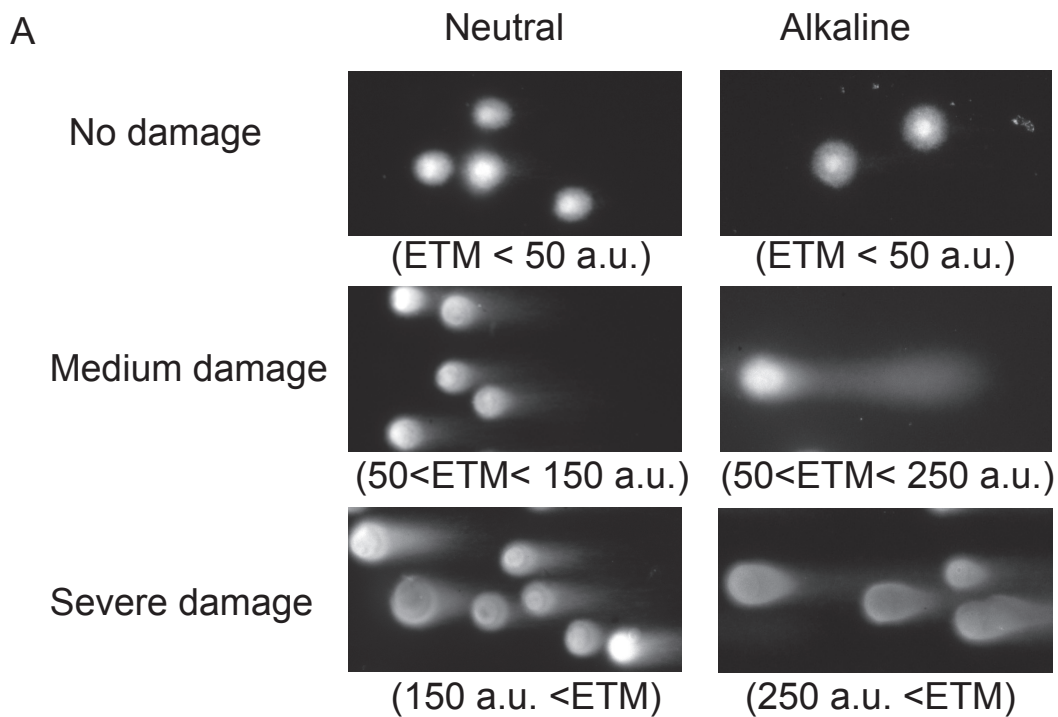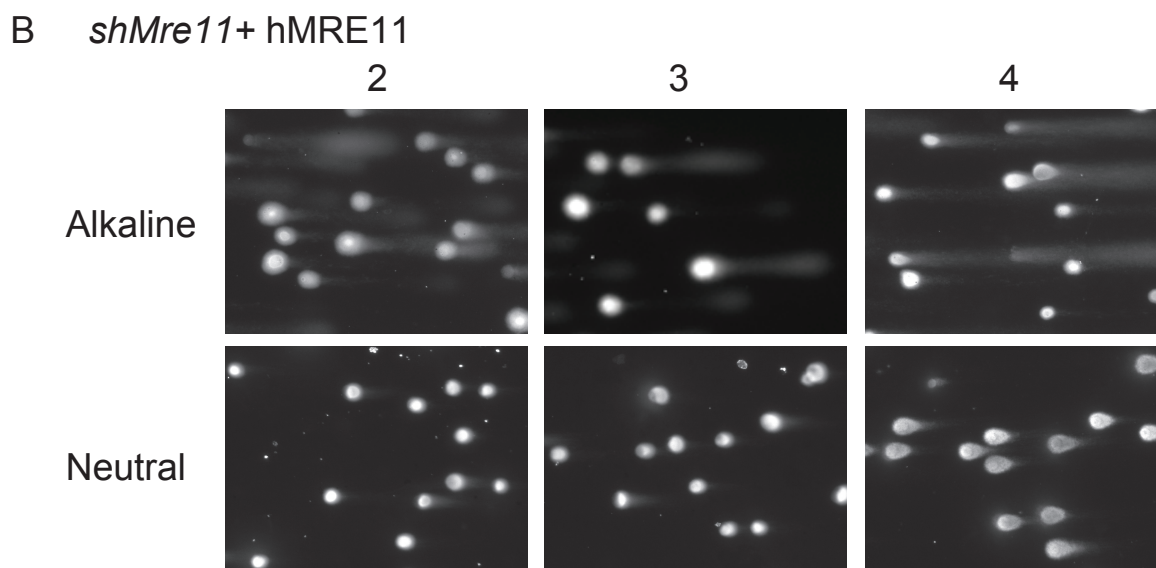

**A.** Representative images from comet assays performed in neutral and alkaline conditions are shown, demonstrating no damage, medium damage and severe damage.

**B.** Comet assay for *Mre11*-KD cells supplemented with human *Mre11*. Experimental conditions (2, 3 and 4) are described in Fig. 2C.

## Supplementary figure 5 - Checkpoint abrogation increases broken DNA in Mre11-KD cells

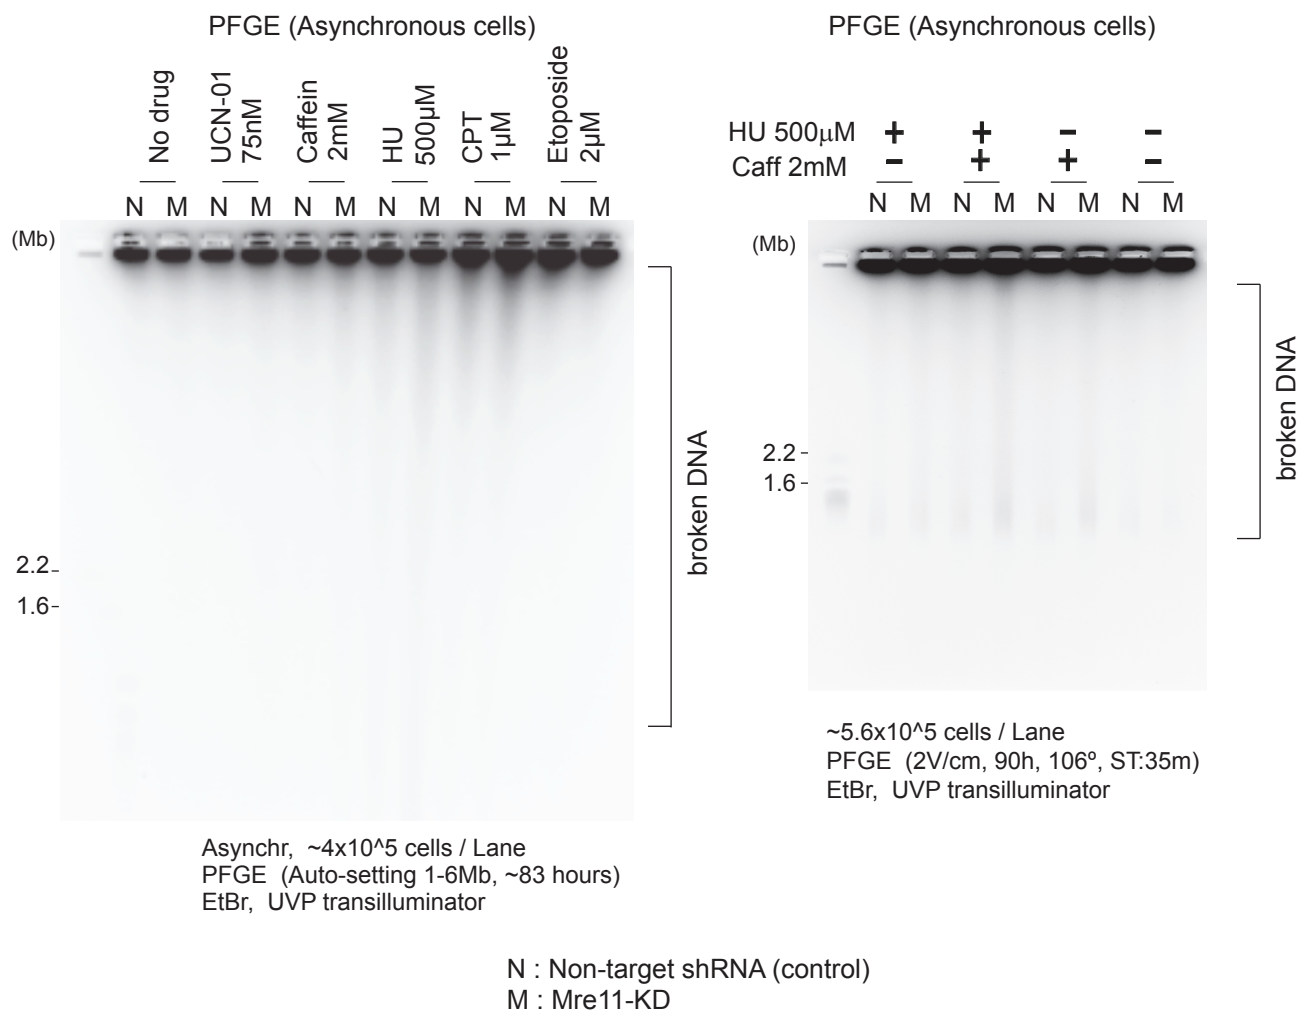

Checkpoint abrogation increased broken DNA. Cells were treated as indicated for 24 hours and were mounted into agarose blocks. Pulse field gel electrophoresis was performed to separate highmolecular weight DNA. Note that Caffein alone (6th lane from left in both the left and right panel) increases broken DNA in Mre11-KD cells cells more noticeably than in control cells.



Supplementary table 1

The number of MTX resistant colonies from 5 genotypes (Fig. 1D)

| Genotype                                       | colony counts |                   |              |              |              |         |       | relative # of colonies |       |
|------------------------------------------------|---------------|-------------------|--------------|--------------|--------------|---------|-------|------------------------|-------|
|                                                | MTX( $\mu$ M) | # of cells plated | Experiment 1 | Experiment 2 | Experiment 3 | Average | STDEV | Average                | STDEV |
| <b>LV-GFP</b>                                  | 0.4           | 10,000            | 2            | 5            | 3            | 3.33    | 1.53  | 1.00                   | 0.46  |
|                                                | 0.8           | 100,000           | 2            | 4            | 3            | 3.00    | 1.00  | 1.00                   | 0.33  |
| <b>shNT</b>                                    | 0.4           | 10,000            | 15           | 11           | 6            | 10.67   | 4.51  | 3.20                   | 1.35  |
|                                                | 0.8           | 100,000           | 7            | 7            | 3            | 5.67    | 2.31  | 1.89                   | 0.77  |
| <b>shMre11</b>                                 | 0.4           | 10,000            | 58           | 50           | 53           | 53.67   | 4.04  | 16.10                  | 1.21  |
|                                                | 0.8           | 100,000           | 34           | 43           | 46           | 41.00   | 6.24  | 13.67                  | 2.08  |
| <b>shMre11 <math>\rightarrow</math> hMre11</b> | 0.4           | 10,000            | 21           | 26           | 34           | 27.00   | 6.56  | 8.10                   | 1.97  |
|                                                | 0.8           | 100,000           | 19           | 14           | 13           | 15.33   | 3.21  | 5.11                   | 1.07  |
| <b>hMre11 <math>\rightarrow</math> shMre11</b> | 0.4           | 10,000            | 10           | 8            | 7            | 8.33    | 1.53  | 2.50                   | 0.46  |
|                                                | 0.8           | 100,000           | 7            | 3            | 1            | 3.67    | 3.06  | 1.22                   | 1.02  |

STDEV, standard deviation

## Experimental procedure

Either  $10^5$  (for  $0.8\mu$ M MTX) or  $10^4$  cells (for  $0.4\mu$ M MTX) were plated into a  $10\text{cm}^2$  plate and, on the next day MTX was added to the media. Media and MTX were replaced every four days. After 12 days of selection, colonies on the plates were fixed and stained.

**Supplementary table 2**Fluctuation test (MTX 0.8 $\mu$ M) (Fig. 1G)

| clones      | # of colonies / 10 <sup>5</sup> cells |
|-------------|---------------------------------------|
| shNT-1      | 0                                     |
| shNT-2      | 0                                     |
| shNT-3      | 0                                     |
| shNT-4      | 1                                     |
| shNT-5      | 0                                     |
| shNT-6      | 0                                     |
| shNT-7      | 0                                     |
| shNT-8      | 0                                     |
| shNT-9      | 1                                     |
| shNT-10     | 6                                     |
| Mre11-KD-1  | 3                                     |
| Mre11-KD-2  | 37                                    |
| Mre11-KD-3  | 15                                    |
| Mre11-KD-4  | 10                                    |
| Mre11-KD-5  | 0                                     |
| Mre11-KD-6  | 0                                     |
| Mre11-KD-7  | 0                                     |
| Mre11-KD-8  | 0                                     |
| Mre11-KD-9  | 0                                     |
| Mre11-KD-10 | 0                                     |

**Experimental procedure**

10 single-cell derived cell clones were isolated for both control (*shNT*) and Mre11-KD cells. Clones were expanded up to 10<sup>6</sup> cells and 10<sup>5</sup> cells were plated onto a 10 cm<sup>2</sup> plate for MTX selection (0.8 $\mu$ M). After 12 days, plates were stained with 0.1% crystal violet solution and colonies were counted.

**Supplementary table 3**

| Expression vector | Colony count  |                  |
|-------------------|---------------|------------------|
|                   | with caffeine | without caffeine |
| Sce-1             | 32            | 7                |
| Sce-2             | 34            | 9                |
| Sce-3             | 38            | 14               |
| GFP-1             | 3             | 0                |
| GFP-2             | 3             | 2                |
| GFP-3             | 4             | 3                |

## Experimental procedure

## 1. transfection

Either 5  $\mu\text{g}$  of I-SceI or GFP expression vector was transfected to  $3 \times 10^5$  D79-8 cells.

After 3 hours of transfection,  $1 \times 10^5$  cells were plated into six 10 cm plate.

## 2. Caffeine treatment

The following day, caffeine was added into the three of 6 plates.

## 3. MTX and Caffeine treatments

The following day, media was replaced with the one with  $0.4 \mu\text{M}$  MTX. Caffeine was added to the three plates. The treatment was repeated every four days.

## 4. After 12 days of MTX selection, plates were stained with crystal violet.

## Supplementary table 4

| GO ID                                        | GO cluster                                           | PValue   | Genes                                                                                                                                                        |
|----------------------------------------------|------------------------------------------------------|----------|--------------------------------------------------------------------------------------------------------------------------------------------------------------|
| <b>Genes downregulated in Mre11-KD cells</b> |                                                      |          |                                                                                                                                                              |
| <b>1 Protein Polymerization</b>              |                                                      |          |                                                                                                                                                              |
| GO:0051258                                   | protein polymerization                               | 1.02E-06 | TUBA3A, TUBB2C, FBXO5, TUBA4A, TUBG1, TUBA1B, TUBB3, TUBA1C                                                                                                  |
| GO:0043623                                   | cellular protein complex assembly                    | 1.70E-05 | TUBA3A, IPO5, TUBB2C, FBXO5, TUBA4A, TUBG1, KPNB1, TUBA1B, TUBB3, TUBA1C                                                                                     |
| GO:0034621                                   | cellular macromolecular complex subunit organization | 3.27E-05 | EIF6, TUBB2C, TUBA3A, TTF2, PTRF, IPO5, H2AFZ, TUBA4A, FBXO5, TUBG1, KPNB1, TUBA1B, TUBB3, TUBA1C                                                            |
| GO:0070271                                   | protein complex biogenesis                           | 6.81E-05 | TUBB2C, TUBA3A, PTRF, NPM1, IPO5, C1QTNF2, TUBA4A, FBXO5, TUBG1, KPNB1, TUBA1B, TUBA1C, TUBB3                                                                |
| GO:0006461                                   | protein complex assembly                             | 6.82E-05 | TUBB2C, TUBA3A, PTRF, NPM1, IPO5, C1QTNF2, TUBA4A, FBXO5, TUBG1, KPNB1, TUBA1B, TUBA1C, TUBB3                                                                |
| GO:0043933                                   | macromolecular complex subunit organization          | 1.60E-04 | EIF6, TUBA3A, TUBB2C, TTF2, PTRF, C1QTNF2, NPM1, IPO5, H2AFZ, TUBA4A, FBXO5, TUBG1, KPNB1, TUBA1B, TUBB3, TUBA1C                                             |
| GO:0034622                                   | cellular macromolecular complex assembly             | 1.99E-04 | EIF6, TUBA3A, IPO5, TUBB2C, H2AFZ, FBXO5, TUBA4A, TUBG1, KPNB1, TUBA1B, TUBB3, TUBA1C                                                                        |
| GO:0065003                                   | macromolecular complex assembly                      | 2.32E-04 | EIF6, TUBB2C, TUBA3A, PTRF, C1QTNF2, NPM1, IPO5, H2AFZ, TUBA4A, FBXO5, TUBG1, KPNB1, TUBA1B, TUBB3, TUBA1C                                                   |
| GO:0007017                                   | microtubule-based process                            | 6.55E-04 | TUBA3A, TUBB2C, NPM1, FBXO5, TUBA4A, RANBP1, BIRC5, TUBG1, TUBA1B, TUBB3, TUBA1C                                                                             |
| <b>2 Cell Cycle, DNA metabolism</b>          |                                                      |          |                                                                                                                                                              |
| GO:0007049                                   | cell cycle                                           | 1.03E-05 | EXO1, EID1, CDC6, RAN, MRE11A, BIRC5, LIG4, PMF1, MCM3, RCC1, UBE2C, PIN1, CDT1, CCNE1, NPM1, MTBP, FBXO5, RANBP1, TUBG1, RUVBL1, LFNG, TUBB3, TXNL4A, BLCAP |
| GO:0000279                                   | M phase                                              | 3.52E-05 | EXO1, CDC6, RAN, MRE11A, BIRC5, PMF1, RCC1, UBE2C, FBXO5, RANBP1, RUVBL1, TUBG1, LFNG, TUBB3, TXNL4A                                                         |
| GO:0022403                                   | cell cycle phase                                     | 4.56E-05 | EXO1, CDC6, RAN, MRE11A, BIRC5, PMF1, RCC1, UBE2C, MTBP, FBXO5, RANBP1, RUVBL1, TUBG1, LFNG, TUBB3, TXNL4A                                                   |
| GO:0022402                                   | cell cycle process                                   | 1.01E-04 | EXO1, CDC6, RAN, MRE11A, BIRC5, PMF1, RCC1, UBE2C, NPM1, MTBP, FBXO5, RANBP1, RUVBL1, TUBG1, LFNG, TUBB3, TXNL4A                                             |
| GO:0000278                                   | mitotic cell cycle                                   | 5.35E-04 | CDC6, RAN, MTBP, FBXO5, BIRC5, TUBG1, PMF1, RUVBL1, UBE2C, RCC1, TUBB3, TXNL4A                                                                               |
| GO:0006259                                   | DNA metabolic process                                | 6.84E-04 | HMG1, EXO1, CDC6, HMGB2, MRE11A, HSPA1A, LIG4, RRM2B, MCM3, RMI1, CDT1, CCNE1, SFPQ, PCNA, RAD18, RUVBL1                                                     |
| GO:0051726                                   | regulation of cell cycle                             | 7.32E-04 | CCNE1, HMGB1, JUN, NPM1, MTBP, FBXO5, RANBP1, BIRC5, TUBG1, HSPA8, CDT1                                                                                      |
| <b>3 Protein Transport</b>                   |                                                      |          |                                                                                                                                                              |
| GO:0006913                                   | nucleocytoplasmic transport                          | 3.44E-04 | NXT1, RAN, IPO5, NPM1, KPNA2, KPNB1, HNRNPA1, TOB1                                                                                                           |
| GO:0051169                                   | nuclear transport                                    | 3.90E-04 | NXT1, RAN, IPO5, NPM1, KPNA2, KPNB1, HNRNPA1, TOB1                                                                                                           |
| GO:0006605                                   | protein targeting                                    | 4.84E-04 | NXT1, YWHAG, RAN, TOMM5, IPO5, TIMM13, KPNA2, KPNB1, TOB1                                                                                                    |
| GO:0017038                                   | protein import                                       | 8.98E-04 | RAN, TOMM5, IPO5, TIMM13, KPNA2, KPNB1, TOB1                                                                                                                 |
| GO:0031328                                   | positive regulation of cellular biosynthetic process | 5.76E-04 | FUS, HMGB1, HMGB2, HSP90AA1, GLIS2, TLR2, ZEB1, SOX8, HMGA1, PPARGC1B, CFBF, GATA2, ETS1, JUN, C1QTNF2, NPM1, DYRK2, RBM14, EIF5A2                           |
| GO:0009891                                   | positive regulation of biosynthetic process          | 6.40E-04 | FUS, HMGB1, HMGB2, HSP90AA1, GLIS2, TLR2, ZEB1, SOX8, HMGA1, PPARGC1B, CFBF, GATA2, ETS1, JUN, C1QTNF2, NPM1, DYRK2, RBM14, EIF5A2                           |
| <b>Genes upregulated in Mre11-KD cells</b>   |                                                      |          |                                                                                                                                                              |
| <b>1 Cholesterol biosynthesis</b>            |                                                      |          |                                                                                                                                                              |
| GO:0016126                                   | sterol biosynthetic process                          | 5.30E-13 | CYB5R3, CYP51, EBP, SC5D, MVD, HMGCS1, FDPS, FDFT1, SC4MOL, INSIG2, INSIG1, IDI1, NSDHL, DHCR24                                                              |
| GO:0006695                                   | cholesterol biosynthetic process                     | 8.88E-12 | CYP51, CYB5R3, EBP, MVD, INSIG2, INSIG1, FDPS, HMGCS1, IDI1, NSDHL, DHCR24, FDFT1                                                                            |

## Supplementary table 4

|                                           |                                           |          |                                                                                                                                                                                                            |
|-------------------------------------------|-------------------------------------------|----------|------------------------------------------------------------------------------------------------------------------------------------------------------------------------------------------------------------|
| GO:0006694                                | steroid biosynthetic process              | 9.97E-12 | CYB5R3, CYP51, HSD3B2, EBP, SC5D, MVD, HMGCS1, FDPS, LSS, FDFT1, SC4MOL, INSIG2, PXMP3, INSIG1, SRD5A1, IDI1, DHCR24, NSDHL                                                                                |
| GO:0016125                                | sterol metabolic process                  | 3.10E-08 | CYB5R3, CYP51, EBP, SC5D, MVD, HMGCS1, FDPS, FDFT1, SC4MOL, SREBF2, INSIG2, INSIG1, IDI1, DHCR24, NSDHL                                                                                                    |
| GO:0008203                                | cholesterol metabolic process             | 5.92E-07 | CYB5R3, CYP51, EBP, MVD, HMGCS1, FDPS, FDFT1, SREBF2, INSIG2, INSIG1, IDI1, NSDHL, DHCR24                                                                                                                  |
| GO:0008610                                | lipid biosynthetic process                | 6.53E-07 | CYB5R3, CYP51, HSD3B2, SC5D, PTGS2, MVD, HMGCS1, LSS, SC4MOL, FDFT1, INSIG2, ANG, PXMP3, INSIG1, PIGC, ELOVL7, SRD5A1, PPAP2A, NSDHL, DHCR24, EBP, FDPS, DHRS9, LPCAT3, DGAT2, IDI1                        |
| GO:0008202                                | steroid metabolic process                 | 7.90E-07 | HSD3B2, CYB5R3, CYP51, EBP, SC5D, MVD, HMGCS1, FDPS, LSS, FDFT1, SC4MOL, SREBF2, INSIG2, PXMP3, INSIG1, SRD5A1, IDI1, DHCR24, NSDHL                                                                        |
| GO:0008299                                | isoprenoid biosynthetic process           | 3.26E-04 | MVD, FDPS, HMGCS1, DHRS9, IDI1, FDFT1                                                                                                                                                                      |
| GO:0006720                                | isoprenoid metabolic process              | 4.48E-04 | RDH11, MVD, FDPS, HMGCS1, DHRS9, IDI1, BCO2, FDFT1                                                                                                                                                         |
| <b>2 inflammatory responses</b>           |                                           |          |                                                                                                                                                                                                            |
| GO:0006954                                | inflammatory response                     | 2.49E-05 | NFKBIZ, CCL2, C3, LY96, CXCL3, PPARG, TLR1, F8, IL25, SAA3, TLR3, C1RA, NOD2, NUPR1, CCL20, C1RL, SCN9A, CFH, VNN1, CR1L                                                                                   |
| GO:0009611                                | response to wounding                      | 1.62E-04 | NFKBIZ, CCL2, C3, LY96, CXCL3, PPARG, F2RL1, TLR1, NINJ2, F8, IL25, SAA3, GJA1, TLR3, C1RA, NOD2, NUPR1, CCL20, C1RL, SCN9A, CFH, VNN1, LCP1, CR1L                                                         |
| GO:0045087                                | innate immune response                    | 2.37E-04 | C1RA, TMEM173, NOD2, C3, CEBPG, TLR1, C1RL, CFH, TLR3, VNN1, PRDX1, CR1L                                                                                                                                   |
| GO:0006955                                | immune response                           | 4.72E-04 | MFSD6, CCL2, C3, CXCL3, TLR1, TNFSF15, TLR3, ACP5, BNIP3, PRDX1, LIF, C1RA, TMEM173, NOD2, CCL20, SQSTM1, CFH, VNN1, H2-K1, LY96, CEBPG, ZFR2, BCAP31, LAT2, VAMP7, C1RL, LCP1, CR1L                       |
| <b>3 regulation of cell proliferation</b> |                                           |          |                                                                                                                                                                                                            |
| GO:0008285                                | negative regulation of cell proliferation | 2.46E-04 | PTGS2, PPARG, NDFIP1, PAWR, SFN, CTNNA1, DDR1, SPRY2, CDKN1A, SPRY1, EREG, SERPINF1, NUPR1, CDKN2C, ANG, TGIF1, ATPIF1, TES                                                                                |
| GO:0042127                                | regulation of cell proliferation          | 7.92E-04 | SAT1, CCL2, PTGS2, IL6ST, PPARG, PAWR, SFN, LIF, SPRY2, SPRY1, CDKN2C, ANG, TGM2, FGF1P1, TES, IRS2, CRIP2, NDFIP1, ANXA1, CTNNA1, ATF5, DDR1, CDKN1A, EREG, SERPINF1, NUPR1, DBP, SERPINB5, TGIF1, ATPIF1 |

GO-ID and clusters in DAVID that are up- or down-regulated in Mre11-KD cells are listed along with the gene names in each GO cluster.

## Supplementary table 5 differentially expressed genes

| gene symbol | Annotation                                                  | the Numbers of 35-bp reads |           |           |            | FDRsum     | logPvaluesum |
|-------------|-------------------------------------------------------------|----------------------------|-----------|-----------|------------|------------|--------------|
|             |                                                             | control-1                  | control-2 | Mre11KD-1 | Mre11-KD-2 |            |              |
| SLPI        | antileukoproteinase                                         | 34                         | 32        | 9980      | 8168       | 5.173E-191 | 1.7622E-195  |
| FGFBP1      | fibroblast growth factor-binding protein 1                  | 0                          | 0         | 1928      | 886        | 5.8064E-78 | 9.39618E-82  |
| Sprr1a      | cornifin-A                                                  | 1217                       | 1295      | 6334      | 8817       | 3.7036E-70 | 7.25503E-74  |
| Prnp        | major prion protein                                         | 701                        | 722       | 3663      | 3257       | 1.6268E-65 | 4.01798E-69  |
| BEX2        | protein BEX2                                                | 197                        | 245       | 1160      | 1162       | 1.3803E-63 | 3.98937E-67  |
| Gcnt3       | beta-1,3-galactosyl-O-glycosyl-glycoprotein beta-1,6-N-ac   | 2                          | 2         | 210       | 164        | 2.8321E-59 | 9.40737E-63  |
| Hnrnpd      | heterogeneous nuclear ribonucleoprotein D0                  | 2822                       | 3468      | 222       | 320        | 1.026E-57  | 3.84476E-61  |
| Sfn         | 14-3-3 protein sigma                                        | 6                          | 8         | 324       | 565        | 3.6577E-45 | 2.21185E-48  |
| Vasn        | vasorin                                                     | 1423                       | 1684      | 542       | 662        | 8.1547E-34 | 1.13904E-36  |
| Ier3        | radiation-inducible immediate-early gene IEX-1              | 1902                       | 1965      | 5567      | 6116       | 1.0437E-31 | 1.72448E-34  |
| Jun         | transcription factor AP-1                                   | 2206                       | 2650      | 897       | 1015       | 2.9936E-31 | 5.20121E-34  |
| Cxcl3       | Cxcl3                                                       | 750                        | 956       | 3128      | 3644       | 2.4366E-29 | 4.83529E-32  |
| Serpib5     | serine peptidase inhibitor, clade B, member 5               | 7                          | 7         | 781       | 912        | 8.0717E-28 | 1.77368E-30  |
| Vamp7       | vesicle-associated membrane protein 8                       | 870                        | 1014      | 3265      | 3040       | 1.7542E-27 | 3.95919E-30  |
| Sema4d      | semaphorin 4D                                               | 4                          | 5         | 70        | 74         | 3.7953E-27 | 8.82474E-30  |
| F2rl1       | coagulation factor II receptor 1, transcript variant 2      | 24                         | 22        | 118       | 133        | 2.7247E-25 | 7.30695E-28  |
| F2rl1       | coagulation factor II %28thrombin%29 receptor 1, transcr    | 24                         | 22        | 118       | 133        | 2.7247E-25 | 7.30999E-28  |
| Gpx1        | glutathione peroxidase 1                                    | 5660                       | 6023      | 2467      | 2824       | 1.2945E-24 | 3.69018E-27  |
| Blcap       | bladder cancer-associated protein                           | 1035                       | 1135      | 487       | 505        | 7.638E-24  | 2.3354E-26   |
| Fah         | fumarylacetoacetase                                         | 434                        | 447       | 3724      | 3230       | 2.4228E-23 | 7.63261E-26  |
| Col8a1      | collagen alpha-1%28VIII%29 chain                            | 356                        | 444       | 1766      | 2418       | 5.1886E-23 | 1.67926E-25  |
| Id3         | DNA-binding protein inhibitor ID-3                          | 1704                       | 2064      | 377       | 581        | 7.2463E-23 | 2.36377E-25  |
| FHL1        | four and a half LIM domains protein 1, transcript variant 1 | 1276                       | 1484      | 123       | 194        | 2.7233E-22 | 9.26931E-25  |
| FHL1        | four and a half LIM domains protein 1, transcript variant 2 | 1276                       | 1484      | 123       | 194        | 2.7233E-22 | 9.27762E-25  |
| Foxs1       | forkhead box protein S1                                     | 562                        | 617       | 247       | 260        | 3.9216E-22 | 1.34938E-24  |
| Klhl34      | kelch-like protein 34                                       | 66                         | 78        | 208       | 254        | 4.2578E-22 | 1.47592E-24  |
| SOCS2       | suppressor of cytokine signaling 2                          | 208                        | 232       | 719       | 645        | 6.5556E-21 | 2.52365E-23  |
| Dag1        | dystroglycan 1                                              | 12385                      | 13840     | 25541     | 27034      | 4.4026E-20 | 1.8786E-22   |
| Tmem125     | transmembrane protein 125                                   | 1                          | 0         | 44        | 40         | 5.8896E-20 | 2.54823E-22  |
| Pla2g6      | phospholipase A2, membrane associated                       | 11                         | 5         | 380       | 265        | 1.1702E-19 | 5.28219E-22  |
| Plet1       | placenta-expressed transcript 1 protein                     | 451                        | 489       | 1852      | 1672       | 4.5309E-19 | 2.10504E-21  |
| Pex11a      | peroxisomal membrane protein 11A                            | 40                         | 32        | 145       | 139        | 6.1811E-19 | 3.01652E-21  |
| Dhrs9       | dehydrogenase/reductase SDR family member 9                 | 26                         | 29        | 283       | 300        | 9.1545E-19 | 4.55113E-21  |
| Bpgm        | bisphosphoglycerate mutase                                  | 386                        | 517       | 974       | 1155       | 3.3367E-18 | 1.80351E-20  |
| Mvd         | diphosphomevalonate decarboxylase                           | 1957                       | 1922      | 5488      | 5968       | 5.1326E-17 | 3.12852E-19  |
| Gramd1c     | GRAM domain-containing protein 1C                           | 3                          | 2         | 53        | 43         | 5.6456E-17 | 3.50046E-19  |
| Tnfsf9      | tumor necrosis factor ligand superfamily member 9           | 2627                       | 2961      | 450       | 563        | 6.6887E-17 | 4.2042E-19   |
| Tlr2        | toll receptor 2                                             | 269                        | 323       | 116       | 135        | 7.5911E-17 | 4.81023E-19  |
| Chrn1       | cholinergic receptor, nicotinic, beta polypeptide 1         | 97                         | 121       | 1173      | 1050       | 8.6375E-17 | 5.50273E-19  |
| them6       | UPF0670 protein C8orf55 homolog                             | 407                        | 382       | 1363      | 1354       | 8.983E-17  | 5.73813E-19  |
| Foxa1       | hepatocyte nuclear factor 3-alpha                           | 16                         | 17        | 76        | 83         | 2.3356E-16 | 1.55757E-18  |
| Inhbb       | inhibin beta B chain                                        | 785                        | 989       | 357       | 471        | 2.9066E-16 | 1.95322E-18  |
| SH3TC1      | SH3 domain and tetratricopeptide repeats-containing prot    | 4                          | 4         | 54        | 46         | 3.6719E-16 | 2.49875E-18  |
| Tubb4a      | tubulin, beta 4A class IVA                                  | 1548                       | 1942      | 653       | 916        | 4.9295E-16 | 3.41338E-18  |
| Vnn1        | vanin 1                                                     | 3796                       | 4904      | 9015      | 9511       | 1.0147E-15 | 7.16559E-18  |
| Gja1        | gap junction protein, alpha 1                               | 7243                       | 8349      | 14276     | 13951      | 2.0808E-15 | 1.49721E-17  |
| Trib3       | tribbles homolog 3                                          | 779                        | 852       | 3745      | 2632       | 2.9452E-15 | 2.13779E-17  |
| Rnase1      | ribonuclease 4 (2-5A-dependent ribonuclease)                | 136                        | 171       | 588       | 437        | 4.3586E-15 | 3.29647E-17  |
| Exo1        | Exo1                                                        | 854                        | 1028      | 403       | 529        | 6.0522E-15 | 4.71137E-17  |
| Ppap2a      | lipid phosphate phosphohydrolase 1                          | 903                        | 1122      | 2400      | 2550       | 1.0948E-14 | 8.78177E-17  |
| Tob1        | protein Tob1                                                | 249                        | 307       | 115       | 131        | 1.1405E-14 | 9.18939E-17  |
| Krt8        | keratin, type II cytoskeletal 8                             | 0                          | 2         | 29        | 38         | 1.7963E-14 | 1.48709E-16  |
| Fibin       | fin bud initiation factor homolog                           | 3                          | 4         | 80        | 44         | 2.2028E-14 | 1.85173E-16  |
| Itm2b       | integral membrane protein 2B                                | 541                        | 678       | 2317      | 1814       | 3.5214E-14 | 3.0632E-16   |
| Tmem173     | transmembrane protein 173                                   | 6                          | 4         | 427       | 388        | 3.6258E-14 | 3.16835E-16  |
| Ddit4       | DNA damage-inducible transcript 4 protein                   | 80                         | 72        | 271       | 297        | 3.9836E-14 | 3.50482E-16  |
| Tnfsf15     | tumor necrosis factor ligand superfamily member 15          | 0                          | 0         | 26        | 27         | 4.5178E-14 | 4.00176E-16  |
| Cspg4       | chondroitin sulfate proteoglycan 4                          | 7367                       | 8219      | 878       | 1552       | 5.9342E-14 | 5.36243E-16  |
| Filip1l     | filamin A interacting protein 1                             | 170                        | 179       | 587       | 415        | 6.2088E-14 | 5.63707E-16  |
| Aatk        | apoptosis-associated tyrosine kinase                        | 9                          | 2         | 48        | 51         | 6.9937E-14 | 6.37347E-16  |
| Hpse        | heparanase                                                  | 494                        | 599       | 2408      | 2317       | 1.0153E-13 | 9.65929E-16  |
| Fdps        | farnesyl pyrophosphate synthase                             | 4263                       | 4732      | 12962     | 14047      | 1.0496E-13 | 1.0012E-15   |
| Atf4        | Atf4                                                        | 2179                       | 2449      | 5576      | 4841       | 1.2221E-13 | 1.17723E-15  |
| Tcf19       | transcription factor 19-like protein                        | 668                        | 743       | 199       | 334        | 2.1758E-13 | 2.15664E-15  |
| Thns1l      | threonine synthase-like 1                                   | 206                        | 205       | 525       | 438        | 2.2124E-13 | 2.20273E-15  |
| Itm2c       | integral membrane protein 2C                                | 5932                       | 6538      | 14142     | 12743      | 3.5851E-13 | 3.56344E-15  |
| Saa3        | serum amyloid A-3 protein                                   | 0                          | 0         | 308       | 134        | 5.4869E-13 | 5.77145E-15  |
| Ngfrap1     | protein BEX3                                                | 677                        | 779       | 1385      | 1296       | 6.0986E-13 | 6.44075E-15  |

## Supplementary table 5 differentially expressed genes

|           |                                                             |       |       |       |       |            |             |
|-----------|-------------------------------------------------------------|-------|-------|-------|-------|------------|-------------|
| Mfsd6     | major facilitator superfamily domain-containing protein 6   | 209   | 283   | 1668  | 1628  | 8.1754E-13 | 8.74549E-15 |
| Arpc1b    | actin-related protein 2/3 complex subunit 1B                | 2124  | 2247  | 3762  | 3973  | 1.9696E-12 | 2.20679E-14 |
| Tspan7    | tetraspanin-7                                               | 1223  | 1389  | 3574  | 3231  | 2.2795E-12 | 2.59952E-14 |
| Pnlcd1    | poly(A)-specific ribonuclease PARN domain-containing pr     | 61    | 96    | 318   | 210   | 2.3216E-12 | 2.65944E-14 |
| Ang       | angiogenin                                                  | 21    | 21    | 83    | 76    | 3.3268E-12 | 3.89318E-14 |
| SLC39A2   | zinc transporter ZIP2                                       | 3     | 3     | 42    | 33    | 5.0571E-12 | 6.09027E-14 |
| Actg1     | actin, cytoplasmic 2                                        | 56322 | 64882 | 32142 | 37602 | 7.2536E-12 | 8.84403E-14 |
| Slco4a1   | solute carrier organic anion transporter family, member 4a  | 2     | 0     | 26    | 28    | 7.2194E-12 | 8.94034E-14 |
| Mgat2     | alpha-1,6-mannosyl-glycoprotein 2-beta-N-acetylglucosar     | 1955  | 2263  | 1061  | 1338  | 7.6094E-12 | 9.46219E-14 |
| Acta1     | actin, alpha skeletal muscle A                              | 2098  | 2500  | 1209  | 1477  | 8.1808E-12 | 1.02145E-13 |
| Dnajb1    | dnaJ homolog subfamily B member 1                           | 1833  | 2070  | 728   | 987   | 1.0686E-11 | 1.35066E-13 |
| Sc4mol    | c-4 methylsterol oxidase                                    | 2893  | 3476  | 6876  | 6386  | 1.2587E-11 | 1.61307E-13 |
| Phyhip    | phytanoyl-CoA hydroxylase-interacting protein               | 1     | 2     | 29    | 28    | 1.3414E-11 | 1.72624E-13 |
| Idh1      | isocitrate dehydrogenase [NADP] cytoplasmic                 | 2066  | 2537  | 5410  | 5127  | 1.3792E-11 | 1.7761E-13  |
| Lss       | lanosterol synthase                                         | 1978  | 1993  | 7585  | 8186  | 1.4154E-11 | 1.80225E-13 |
| Reep5     | receptor expression-enhancing protein 5                     | 1002  | 1151  | 2482  | 2488  | 1.4657E-11 | 1.81861E-13 |
| Tuba1b    | tubulin alpha-1B chain                                      | 13741 | 15692 | 5970  | 8662  | 1.6009E-11 | 2.09562E-13 |
| Gabarapl1 | gamma-aminobutyric acid receptor-associated protein-like    | 1028  | 1185  | 3562  | 3134  | 1.9587E-11 | 2.60077E-13 |
| Bnc2      | basonuclin 2, transcript variant 2                          | 29    | 36    | 4     | 2     | 2.4249E-11 | 3.28108E-13 |
| Bnc2      | basonuclin 2, transcript variant 1                          | 29    | 36    | 4     | 2     | 2.4249E-11 | 3.28173E-13 |
| Tuba1b    | Tuba1b                                                      | 64159 | 73791 | 26187 | 38340 | 2.6401E-11 | 3.42154E-13 |
| Tpm1      | tropomyosin alpha-1 chain, transcript variant 2             | 1786  | 2193  | 4917  | 4383  | 2.8384E-11 | 3.72675E-13 |
| Tpm1      | tropomyosin alpha-1 chain, transcript variant 6             | 853   | 1062  | 2295  | 2094  | 2.8384E-11 | 3.72809E-13 |
| Pnrc2     | proline-rich nuclear receptor coactivator 1                 | 162   | 166   | 315   | 340   | 3.0005E-11 | 4.11697E-13 |
| C1ra      | calcium-dependent serine proteinase                         | 2471  | 2749  | 8614  | 6911  | 3.2949E-11 | 4.52044E-13 |
| Ddr1      | discooidin domain receptor family, member 1, transcript va  | 974   | 967   | 3443  | 3446  | 3.7944E-11 | 5.22291E-13 |
| Mex3b     | RNA-binding protein MEX3B                                   | 132   | 134   | 54    | 49    | 4.4613E-11 | 6.28469E-13 |
| Tuba4a    | tubulin alpha-4A chain                                      | 6813  | 7791  | 2617  | 4062  | 6.1665E-11 | 8.55342E-13 |
| TMEM217   | transmembrane protein 217                                   | 7     | 4     | 62    | 39    | 7.6995E-11 | 1.12137E-12 |
| Rdh11     | retinol dehydrogenase 11                                    | 1000  | 1138  | 3188  | 3081  | 1.0181E-10 | 1.51995E-12 |
| Il24      | interleukin-24                                              | 0     | 0     | 20    | 21    | 1.0335E-10 | 1.54652E-12 |
| Lamb3     | laminin, beta 3                                             | 22    | 35    | 1529  | 1250  | 1.1113E-10 | 1.66223E-12 |
| Tpk1      | thiamin pyrophosphokinase 1                                 | 39    | 41    | 115   | 106   | 1.3405E-10 | 2.05158E-12 |
| CXCL16    | c-X-C motif chemokine 16                                    | 701   | 807   | 1739  | 1835  | 1.4792E-10 | 2.18877E-12 |
| Atxn1     | ataxin 1                                                    | 28    | 34    | 136   | 117   | 1.6808E-10 | 2.51708E-12 |
| Ckmt1     | creatine kinase, mitochondrial 1, ubiquitous, transcript va | 26    | 31    | 524   | 476   | 1.6351E-10 | 2.53714E-12 |
| Ckmt1     | creatine kinase, mitochondrial 1, ubiquitous, transcript va | 26    | 32    | 530   | 478   | 1.6384E-10 | 2.5423E-12  |
| Nupr1     | nuclear protein 1                                           | 931   | 1105  | 2183  | 1911  | 1.8039E-10 | 2.67244E-12 |
| Hspa8     | heat shock cognate 71 kDa protein                           | 40208 | 47225 | 19483 | 27310 | 1.8772E-10 | 2.97066E-12 |
| Hoga1     | 4-hydroxy-2-oxoglutarate aldolase 1                         | 43    | 51    | 123   | 117   | 2.3954E-10 | 3.82751E-12 |
| Fst       | follicistatin                                               | 180   | 204   | 558   | 660   | 3.1823E-10 | 5.005E-12   |
| Ptgs2     | prostaglandin-endoperoxide synthase 2                       | 306   | 379   | 1742  | 1867  | 4.0843E-10 | 6.79364E-12 |
| Sqle      | squalene monooxygenase                                      | 4159  | 4400  | 6831  | 7377  | 5.2683E-10 | 8.91882E-12 |
| IFI27     | interferon alpha-inducible protein 27, mitochondrial        | 14    | 6     | 104   | 72    | 5.9633E-10 | 9.81601E-12 |
| Dtymk     | thymidylate kinase                                          | 1883  | 2218  | 934   | 1206  | 6.5042E-10 | 1.06007E-11 |
| Pkp3      | plakophilin 3                                               | 694   | 784   | 2368  | 2712  | 7.5184E-10 | 1.2645E-11  |
| Pirt      | phosphoinositide-interacting protein                        | 1263  | 1710  | 2330  | 2667  | 7.4048E-10 | 1.28467E-11 |
| Slc23a3   | solute carrier family 23, member 3, transcript variant 2    | 0     | 0     | 24    | 17    | 7.4671E-10 | 1.29676E-11 |
| Slc23a3   | solute carrier family 23 member 3, transcript variant 1     | 0     | 0     | 24    | 17    | 7.47E-10   | 1.29789E-11 |
| Spsb2     | SPRY domain-containing SOCS box protein 4                   | 226   | 253   | 20    | 49    | 7.9582E-10 | 1.3922E-11  |
| Nfil3     | nuclear factor, interleukin 3, regulated                    | 404   | 367   | 778   | 728   | 8.0063E-10 | 1.4013E-11  |
| Epm2aip1  | EPM2A-interacting protein 1                                 | 536   | 610   | 976   | 950   | 8.1192E-10 | 1.42244E-11 |
| Tgm2      | transglutaminase 2, C polypeptide                           | 1179  | 1353  | 3853  | 4429  | 8.4612E-10 | 1.4832E-11  |
| Gfod1     | glucose-fructose oxidoreductase domain containing 1         | 153   | 183   | 397   | 407   | 9.5778E-10 | 1.69837E-11 |
| Trp53inp1 | tumor protein p53-inducible nuclear protein 2               | 16    | 13    | 104   | 83    | 9.9675E-10 | 1.7623E-11  |
| Tuba3a    | tubulin alpha-3 chain                                       | 21    | 24    | 1     | 1     | 1.2717E-09 | 2.31457E-11 |
| Exd1      | Exd1                                                        | 90    | 120   | 253   | 210   | 1.285E-09  | 2.34205E-11 |
| Hspa8     | heat shock cognate 70 kDa protein                           | 52715 | 62565 | 25771 | 36135 | 1.3711E-09 | 2.49545E-11 |
| Tnrc18    | zinc finger protein 469                                     | 887   | 885   | 490   | 543   | 1.3982E-09 | 2.56635E-11 |
| AMAC1     | protein AMAC1                                               | 14    | 9     | 48    | 51    | 2.0345E-09 | 3.84513E-11 |
| Ascl2     | achaete-scute homolog 2                                     | 270   | 232   | 61    | 87    | 2.5147E-09 | 4.85977E-11 |
| Arpc1b    | actin related protein complex, subunit 1B                   | 11146 | 11883 | 19753 | 20773 | 2.7369E-09 | 4.86412E-11 |
| HMGCS1    | hydroxymethylglutaryl-CoA synthase, cytoplasmic             | 7961  | 8805  | 19496 | 23271 | 2.5666E-09 | 4.96431E-11 |
| Lrrc8d    | leucine-rich repeat-containing protein 8D                   | 739   | 890   | 1482  | 1326  | 2.7092E-09 | 5.27018E-11 |
| Tlr3      | toll receptor 3                                             | 19    | 18    | 459   | 360   | 3.027E-09  | 5.92107E-11 |
| Insig1    | Insig1                                                      | 1542  | 1666  | 3418  | 3846  | 3.3109E-09 | 6.37869E-11 |
| Lgals3    | galectin-3                                                  | 6012  | 7228  | 11379 | 12440 | 3.4657E-09 | 6.5406E-11  |
| Tmeff2    | tomoregulin-2                                               | 55    | 51    | 1     | 3     | 3.3905E-09 | 6.72825E-11 |
| Msn       | moesin                                                      | 9324  | 11408 | 3016  | 4016  | 3.5439E-09 | 7.06208E-11 |
| Zbtb38    | zinc finger and BTB domain-containing protein 38            | 467   | 540   | 993   | 842   | 3.9909E-09 | 8.0251E-11  |

## Supplementary table 5 differentially expressed genes

|           |                                                             |       |       |       |       |            |             |
|-----------|-------------------------------------------------------------|-------|-------|-------|-------|------------|-------------|
| Prdx1     | Prdx1                                                       | 9184  | 11522 | 17344 | 17514 | 6.3271E-09 | 1.31315E-10 |
| Npr1      | atrial natriuretic peptide receptor 1                       | 3     | 5     | 37    | 28    | 8.6747E-09 | 1.85075E-10 |
| CCL2      | c-C motif chemokine 2                                       | 392   | 535   | 1035  | 939   | 1.0258E-08 | 2.21761E-10 |
| Trp53inp1 | tumor protein p53-inducible nuclear protein 1, transcript v | 36    | 50    | 362   | 268   | 1.026E-08  | 2.22103E-10 |
| Trp53inp1 | tumor protein p53-inducible nuclear protein 1, transcript v | 36    | 50    | 362   | 268   | 1.026E-08  | 2.22131E-10 |
| Tmem65    | transmembrane protein 65                                    | 553   | 792   | 313   | 409   | 1.1392E-08 | 2.48959E-10 |
| Gsn       | gelsolin                                                    | 280   | 289   | 1589  | 1720  | 1.1609E-08 | 2.54181E-10 |
| Cxcr7     | chemokine %28C-X-C motif%29 receptor 7                      | 1235  | 1664  | 494   | 617   | 1.2023E-08 | 2.64194E-10 |
| Crtap     | cartilage-associated protein                                | 1858  | 2167  | 797   | 975   | 1.5736E-08 | 3.51957E-10 |
| Ctnna1    | catenin alpha-1                                             | 3518  | 4252  | 8521  | 8909  | 1.5701E-08 | 3.52455E-10 |
| Mettl7a1  | methyltransferase-like protein 7A                           | 343   | 394   | 1053  | 706   | 1.6436E-08 | 3.56239E-10 |
| H1f0      | histone H1.0                                                | 3740  | 4305  | 8351  | 6570  | 1.8849E-08 | 4.32158E-10 |
| Nrg4      | pro-neuregulin-4, membrane-bound isoform                    | 128   | 172   | 700   | 606   | 1.9428E-08 | 4.45623E-10 |
| Zfp821    | zinc finger protein 821                                     | 48    | 58    | 129   | 116   | 1.9453E-08 | 4.47008E-10 |
| Ccl20     | c-C motif chemokine 20                                      | 0     | 2     | 61    | 52    | 1.9595E-08 | 4.50615E-10 |
| Dyrk2     | dual specificity tyrosine-phosphorylation-regulated kinase  | 836   | 938   | 513   | 604   | 2.2246E-08 | 5.18777E-10 |
| Krt7      | keratin, type II cytoskeletal 7                             | 36    | 22    | 429   | 362   | 2.3014E-08 | 5.39613E-10 |
| Xkr8      | XK-related protein 8                                        | 46    | 39    | 11    | 5     | 2.5402E-08 | 6.02318E-10 |
| Ets1      | protein C-ets-1                                             | 3567  | 4563  | 1262  | 1440  | 2.7036E-08 | 6.46358E-10 |
| Ywhag     | 14-3-3 protein gamma                                        | 1930  | 2194  | 1161  | 1388  | 2.8235E-08 | 6.60561E-10 |
| Sdf2      | stromal cell-derived factor 2                               | 528   | 669   | 1197  | 1086  | 2.9151E-08 | 6.8096E-10  |
| Atp6ap1   | ATPase, H%2B transporting, lysosomal accessory protein      | 2683  | 3266  | 7036  | 6565  | 3.0103E-08 | 6.8344E-10  |
| Creb3i3   | cAMP responsive element binding protein 3 3                 | 3     | 3     | 27    | 25    | 3.0072E-08 | 7.26868E-10 |
| C1rl      | complement component 1, r subcomponent                      | 11    | 11    | 73    | 43    | 3.1467E-08 | 7.6436E-10  |
| Tlcd1     | TLC domain-containing protein 1                             | 208   | 227   | 684   | 660   | 3.4072E-08 | 8.2718E-10  |
| Alyref    | THO complex subunit 4                                       | 3601  | 4200  | 2119  | 2455  | 3.6069E-08 | 8.60473E-10 |
| Lypd1     | ly6/PLAUR domain-containing protein 1                       | 72    | 73    | 165   | 148   | 3.6339E-08 | 8.95703E-10 |
| Sertad2   | SERTA domain-containing protein 2                           | 2202  | 2708  | 3479  | 3892  | 3.7365E-08 | 9.23208E-10 |
| Hist1h1c  | histone H1.2                                                | 97    | 156   | 465   | 331   | 3.8549E-08 | 9.56073E-10 |
| XPNPEP2   | xaa-Pro aminopeptidase 2                                    | 3     | 1     | 24    | 22    | 4.4758E-08 | 1.1238E-09  |
| Hnrnpa1   | heterogeneous nuclear ribonucleoprotein A1                  | 14120 | 16959 | 8343  | 9716  | 4.6277E-08 | 1.14415E-09 |
| Actg2     | actin, gamma-enteric smooth muscle, transcript variant 1    | 1404  | 1547  | 828   | 1030  | 4.9545E-08 | 1.25476E-09 |
| Actg2     | actin, gamma-enteric smooth muscle, transcript variant 2    | 1404  | 1547  | 828   | 1030  | 4.9545E-08 | 1.25497E-09 |
| Chst14    | carbohydrate sulfotransferase 14                            | 833   | 970   | 570   | 599   | 4.9764E-08 | 1.26094E-09 |
| Btg2      | protein BTG2                                                | 11    | 11    | 119   | 114   | 5.1017E-08 | 1.29572E-09 |
| Ppcs      | phosphopantothenate--cysteine ligase                        | 867   | 959   | 2021  | 2010  | 5.4165E-08 | 1.29628E-09 |
| Vim       | vimentin                                                    | 46221 | 55291 | 21503 | 30032 | 5.7642E-08 | 1.3942E-09  |
| Pdzrn3    | PDZ domain containing RING finger 3                         | 19    | 28    | 67    | 67    | 5.6314E-08 | 1.45232E-09 |
| Pparg     | Pparg                                                       | 1310  | 1580  | 3339  | 2951  | 5.7967E-08 | 1.50025E-09 |
| Prrg2     | transmembrane gamma-carboxyglutamic acid protein 2          | 16    | 15    | 166   | 154   | 6.4592E-08 | 1.6415E-09  |
| Cebpg     | CCAAT/enhancer-binding protein gamma                        | 183   | 240   | 405   | 359   | 6.5236E-08 | 1.71241E-09 |
| Zeb1      | zinc finger E-box-binding homeobox 1                        | 1565  | 1959  | 332   | 339   | 6.5439E-08 | 1.71941E-09 |
| PDP2      | Pyruvate dehydrogenase [acetyl-transferring]-phosphatas     | 280   | 349   | 495   | 533   | 6.5455E-08 | 1.7204E-09  |
| Galm      | aldose 1-epimerase                                          | 435   | 458   | 1210  | 1183  | 6.8937E-08 | 1.82067E-09 |
| Rps2      | 40S ribosomal protein S2                                    | 13087 | 14694 | 8184  | 10029 | 7.2564E-08 | 1.92516E-09 |
| Exd1      | exonuclease 3%27-5%27 domain containing 1                   | 30    | 32    | 100   | 77    | 8.084E-08  | 2.16469E-09 |
| Hook2     | hook homolog 2                                              | 698   | 745   | 2825  | 2797  | 9.879E-08  | 2.45542E-09 |
| Armcx5    | armadillo repeat-containing X-linked protein 5              | 233   | 274   | 460   | 417   | 9.524E-08  | 2.59654E-09 |
| Cnr1p1    | CB1 cannabinoid receptor-interacting protein 1              | 886   | 1067  | 504   | 486   | 9.8428E-08 | 2.59655E-09 |
| Smad7     | mothers against decapentaplegic homolog 7                   | 21    | 41    | 2     | 5     | 1.0024E-07 | 2.74368E-09 |
| Ppm1f     | protein phosphatase 1F                                      | 1251  | 1324  | 451   | 518   | 1.0747E-07 | 2.95999E-09 |
| Lama3     | laminin, alpha 3                                            | 2     | 5     | 359   | 404   | 1.2491E-07 | 3.50264E-09 |
| S100a10   | protein S100-A10                                            | 2977  | 3571  | 1569  | 2205  | 1.3496E-07 | 3.62281E-09 |
| Anxa1     | annexin A1                                                  | 7368  | 9092  | 13226 | 14992 | 1.4599E-07 | 3.82364E-09 |
| Map6      | microtubule-associated protein 6                            | 2295  | 2261  | 1082  | 1513  | 1.6586E-07 | 4.77195E-09 |
| SHISA4    | protein shisa-4                                             | 14    | 18    | 115   | 112   | 1.8195E-07 | 4.951E-09   |
| Taf7      | Taf7                                                        | 98    | 119   | 203   | 199   | 1.765E-07  | 5.10794E-09 |
| Ap1p2     | amyloid-like protein 2                                      | 5971  | 7150  | 13412 | 12193 | 2.009E-07  | 5.45067E-09 |
| Foxf2     | forkhead box protein F2                                     | 415   | 421   | 791   | 738   | 1.9878E-07 | 5.82484E-09 |
| Ppp1r3f   | protein phosphatase 1 regulatory subunit 3F                 | 131   | 150   | 252   | 247   | 2.0225E-07 | 5.94988E-09 |
| NARS      | asparaginyl-tRNA synthetase, cytoplasmic                    | 1045  | 1287  | 1831  | 1756  | 2.1867E-07 | 6.49792E-09 |
| Irf2bp1   | interferon regulatory factor 2-binding protein              | 1354  | 1301  | 2084  | 2217  | 2.3342E-07 | 6.96425E-09 |
| Cmah      | cytidine monophospho-N-acetylneuraminic acid hydroxyla      | 272   | 317   | 173   | 172   | 2.3916E-07 | 7.16555E-09 |
| Mmrn2     | multimerin 2                                                | 1     | 4     | 21    | 24    | 2.4709E-07 | 7.43714E-09 |
| Anxa4     | annexin A4, transcript variant 1                            | 1666  | 2098  | 4068  | 3928  | 2.7675E-07 | 7.58083E-09 |
| Anxa4     | annexin A4, transcript variant 2                            | 1666  | 2098  | 4068  | 3928  | 2.7675E-07 | 7.58178E-09 |
| Muc1      | mucin-1                                                     | 35    | 72    | 324   | 279   | 2.7204E-07 | 7.83933E-09 |
| OLFM1     | noelin, transcript variant 2                                | 189   | 203   | 490   | 579   | 2.7648E-07 | 8.43718E-09 |
| Abhd13    | abhydrolase domain-containing protein 13                    | 331   | 398   | 648   | 573   | 3.4305E-07 | 1.06906E-08 |
| Fdft1     | farnesyl diphosphate farnesyl transferase 1                 | 1487  | 1544  | 2888  | 3223  | 4.7347E-07 | 1.51028E-08 |



## Supplementary table 5 differentially expressed genes

|         |                                                              |       |       |       |       |            |             |
|---------|--------------------------------------------------------------|-------|-------|-------|-------|------------|-------------|
| Ddr1    | discoidin domain receptor family, member 1, transcript va    | 1066  | 1047  | 3711  | 3742  | 4.7367E-07 | 1.52972E-08 |
| Ddr1    | discoidin domain receptor family, member 1, transcript va    | 1066  | 1047  | 3711  | 3743  | 4.739E-07  | 1.53086E-08 |
| Rrs1    | ribosome biogenesis regulatory protein homolog               | 1266  | 1259  | 515   | 659   | 4.8144E-07 | 1.55769E-08 |
| Nfe2l1  | nuclear factor, erythroid derived 2, 1, transcript variant 3 | 1673  | 1831  | 3512  | 3191  | 4.8368E-07 | 1.56607E-08 |
| Nfe2l1  | nuclear factor, erythroid derived 2, 1, transcript variant 4 | 1654  | 1814  | 3485  | 3149  | 4.8461E-07 | 1.56787E-08 |
| Nfe2l1  | nuclear factor, erythroid derived 2, 1, transcript variant 1 | 2341  | 2600  | 5094  | 4451  | 4.8527E-07 | 1.56868E-08 |
| Nfe2l1  | nuclear factor, erythroid derived 2, 1, transcript variant 2 | 2252  | 2493  | 4910  | 4276  | 4.8527E-07 | 1.56898E-08 |
| Hsd3b2  | 3 beta-hydroxysteroid dehydrogenase/Delta 5->4-isomer        | 12    | 18    | 58    | 46    | 4.8459E-07 | 1.57208E-08 |
| Socs1   | suppressor of cytokine signaling 1                           | 288   | 297   | 151   | 188   | 5.4244E-07 | 1.77916E-08 |
| Tmprss6 | transmembrane serine protease 6                              | 72    | 74    | 12    | 12    | 5.5054E-07 | 1.80899E-08 |
| Ereg    | proepiregulin                                                | 1477  | 1549  | 2599  | 3312  | 5.6994E-07 | 1.88003E-08 |
| C1qbp   | complement component 1 Q subcomponent-binding prote          | 2596  | 3212  | 1641  | 1844  | 6.2324E-07 | 1.98347E-08 |
| Srd5a1  | 3-oxo-5-alpha-steroid 4-dehydrogenase 1                      | 238   | 315   | 620   | 664   | 6.6866E-07 | 2.13172E-08 |
| Amotl2  | angiomin 2                                                   | 3090  | 3182  | 834   | 1013  | 6.3778E-07 | 2.13423E-08 |
| Dnajb9  | dnaJ homolog subfamily B member 9                            | 218   | 284   | 553   | 529   | 6.5469E-07 | 2.19359E-08 |
| Tagln2  | transgelin-2                                                 | 10281 | 11335 | 5182  | 6818  | 6.808E-07  | 2.28873E-08 |
| Trim47  | tripartite motif-containing protein 47                       | 1820  | 2038  | 881   | 1127  | 7.1339E-07 | 2.31042E-08 |
| Chst12  | carbohydrate sulfotransferase 12                             | 739   | 742   | 437   | 503   | 7.9775E-07 | 2.73951E-08 |
| Tceal1  | transcription elongation factor A protein 1                  | 3     | 6     | 34    | 24    | 8.3835E-07 | 2.89395E-08 |
| Cnn1    | calponin-1                                                   | 9     | 10    | 141   | 177   | 8.7278E-07 | 3.02527E-08 |
| Sdcbp2  | syntenin-2                                                   | 19    | 11    | 233   | 181   | 9.8187E-07 | 3.32079E-08 |
| Nufip2  | nuclear fragile X mental retardation-interacting protein 2   | 5474  | 6668  | 3930  | 4347  | 1.0719E-06 | 3.50276E-08 |
| Gpd1l   | glycerol-3-phosphate dehydrogenase 1                         | 835   | 787   | 1891  | 2041  | 1.0197E-06 | 3.58157E-08 |
| Cisd2   | CDGSH iron-sulfur domain-containing protein 1                | 300   | 392   | 667   | 658   | 1.0887E-06 | 3.85257E-08 |
| Hspa8   | Hspa8                                                        | 64142 | 75883 | 31070 | 43140 | 1.0995E-06 | 3.89192E-08 |
| Gpnmb   | transmembrane glycoprotein NMB                               | 1986  | 2326  | 525   | 581   | 1.1595E-06 | 4.12479E-08 |
| Syt16   | synaptotagmin XVI                                            | 86    | 85    | 361   | 359   | 1.2386E-06 | 4.43652E-08 |
| Tssk2   | testis-specific serine/threonine-protein kinase 3            | 10    | 15    | 38    | 46    | 1.492E-06  | 5.46935E-08 |
| F8      | coagulation factor VIII                                      | 12    | 16    | 47    | 43    | 1.6085E-06 | 5.95235E-08 |
| Bcap31  | B-cell receptor-associated protein 31                        | 99    | 118   | 180   | 203   | 1.7504E-06 | 6.5343E-08  |
| SHE     | SH2 domain-containing adapter protein E                      | 12    | 15    | 118   | 133   | 1.8534E-06 | 6.84649E-08 |
| Hspe1   | 10 kDa heat shock protein, mitochondrial                     | 6194  | 7524  | 4074  | 4910  | 2.1065E-06 | 7.83108E-08 |
| PRR13   | proline-rich protein 13                                      | 2440  | 2849  | 5560  | 5549  | 2.2088E-06 | 8.48984E-08 |
| Chsy1   | chondroitin sulfate synthase 1                               | 1751  | 2101  | 1067  | 1333  | 2.2455E-06 | 8.59092E-08 |
| Homez   | homeobox and leucine zipper protein Homez                    | 25    | 25    | 78    | 60    | 2.2358E-06 | 8.61486E-08 |
| C3      | complement C3                                                | 94    | 83    | 4325  | 2485  | 2.4141E-06 | 8.75933E-08 |
| Nacad   | NAC alpha domain containing                                  | 22    | 34    | 120   | 87    | 2.4841E-06 | 8.94151E-08 |
| Bco2    | beta-carotene oxygenase 2                                    | 150   | 186   | 966   | 788   | 2.7047E-06 | 1.03859E-07 |
| Ypel5   | protein yippee-like 5                                        | 210   | 272   | 579   | 501   | 2.7794E-06 | 1.09579E-07 |
| OLFM1   | noelin, transcript variant 1                                 | 781   | 872   | 2124  | 2587  | 3.1091E-06 | 1.24009E-07 |
| Mex3d   | RNA-binding protein MEX3D                                    | 791   | 730   | 386   | 453   | 3.4635E-06 | 1.39491E-07 |
| Fam109a | sesquipedalian-1                                             | 134   | 151   | 82    | 67    | 3.4627E-06 | 1.40173E-07 |
| Zfp365  | protein ZNF365                                               | 22    | 39    | 3     | 8     | 3.5546E-06 | 1.44502E-07 |
| FBL     | rRNA 2'-O-methyltransferase fibrillar                        | 8852  | 9520  | 4341  | 6055  | 4.0727E-06 | 1.48639E-07 |
| Tmbim4  | transmembrane BAX inhibitor motif-containing protein 4       | 657   | 779   | 1478  | 1546  | 4.1513E-06 | 1.54399E-07 |
| Fam46d  | protein FAM46D                                               | 12    | 23    | 48    | 53    | 3.8926E-06 | 1.59733E-07 |
| RRAGA   | ras-related GTP-binding protein A                            | 2101  | 2527  | 3075  | 3485  | 3.9102E-06 | 1.60488E-07 |
| MAP3K3  | mitogen-activated protein kinase 3                           | 1045  | 1129  | 2317  | 2123  | 4.2001E-06 | 1.62722E-07 |
| SrpX    | sushi-repeat-containing protein                              | 432   | 520   | 86    | 82    | 4.1818E-06 | 1.72755E-07 |
| Pip4k2c | phosphatidylinositol-5-phosphate 4-kinase, type II, gamma    | 282   | 328   | 1041  | 1009  | 4.5361E-06 | 1.88781E-07 |
| Dr1     | protein Dr1                                                  | 1583  | 2130  | 1107  | 1199  | 4.6376E-06 | 1.91783E-07 |
| Slc5a2  | solute carrier family 5 (sodium/glucose cotransporter), me   | 330   | 417   | 180   | 182   | 4.6022E-06 | 1.92809E-07 |
| PLAC8   | placenta-specific gene 8 protein                             | 339   | 399   | 820   | 739   | 5.3691E-06 | 2.06925E-07 |
| Naip1   | NLR family, apoptosis inhibitory protein 1                   | 10    | 10    | 37    | 34    | 5.0848E-06 | 2.15672E-07 |
| Tcta    | T-cell leukemia translocation-altered gene protein homolog   | 27    | 19    | 65    | 60    | 5.2071E-06 | 2.21429E-07 |
| Tcta    | T-cell leukemia translocation-altered gene protein homolog   | 27    | 19    | 65    | 60    | 5.2071E-06 | 2.21445E-07 |
| Slc45a1 | proton-associated sugar transporter A                        | 448   | 525   | 1081  | 975   | 5.2954E-06 | 2.25671E-07 |
| Zc3h6   | zinc finger CCCH type containing 6                           | 32    | 27    | 155   | 104   | 5.5111E-06 | 2.35766E-07 |
| Cetn2   | centrin-2                                                    | 458   | 505   | 1116  | 1022  | 5.7028E-06 | 2.43272E-07 |
| Lif     | leukemia inhibitory factor                                   | 141   | 172   | 350   | 342   | 6.2745E-06 | 2.72598E-07 |
| Rhou    | rho-related GTP-binding protein RhoU                         | 99    | 118   | 183   | 189   | 6.2943E-06 | 2.73511E-07 |
| Taldo1  | transaldolase                                                | 566   | 663   | 844   | 950   | 6.7244E-06 | 2.94778E-07 |
| Zfp239  | zinc finger protein 239                                      | 218   | 261   | 139   | 155   | 6.7527E-06 | 2.96535E-07 |
| Sprr1b  | cornifin-B                                                   | 7     | 1     | 21    | 38    | 6.9171E-06 | 3.04111E-07 |
| SELH    | selenoprotein H                                              | 1610  | 1751  | 828   | 984   | 6.9414E-06 | 3.04127E-07 |
| ZFR2    | zinc finger RNA-binding protein 2                            | 6     | 3     | 22    | 26    | 6.9308E-06 | 3.04828E-07 |
| Abcd2   | ATP-binding cassette, sub-family D %28ALD%29, memb           | 87    | 100   | 17    | 25    | 6.95E-06   | 3.05777E-07 |
| Crel2   | Crel2                                                        | 2165  | 2304  | 3756  | 4367  | 7.4944E-06 | 3.07137E-07 |
| PPP1R2  | protein phosphatase inhibitor 2                              | 1126  | 1516  | 2375  | 2535  | 7.8682E-06 | 3.14292E-07 |
| Grina   | glutamate [NMDA] receptor-associated protein 1               | 1253  | 1324  | 2450  | 2224  | 7.7222E-06 | 3.18225E-07 |

## Supplementary table 5 differentially expressed genes

|          |                                                             |       |       |       |       |            |             |
|----------|-------------------------------------------------------------|-------|-------|-------|-------|------------|-------------|
| Cbx3     | chromobox protein homolog 3                                 | 443   | 470   | 285   | 313   | 7.3025E-06 | 3.23417E-07 |
| Tmem185b | transmembrane protein 185B                                  | 428   | 543   | 295   | 341   | 7.7032E-06 | 3.43261E-07 |
| F2r      | proteinase-activated receptor 1                             | 2152  | 2544  | 1651  | 1738  | 7.9408E-06 | 3.55002E-07 |
| Tmem140  | transmembrane protein 140                                   | 49    | 56    | 125   | 99    | 8.023E-06  | 3.58948E-07 |
| Zadh2    | zinc-binding alcohol dehydrogenase domain-containing p      | 289   | 372   | 490   | 515   | 9.0349E-06 | 4.11837E-07 |
| Tuba1c   | Tuba1c                                                      | 40378 | 45620 | 17145 | 24808 | 9.311E-06  | 4.25374E-07 |
| Hspa1a   | heat shock 70 kDa protein 1A                                | 301   | 297   | 158   | 204   | 1.0373E-05 | 4.80962E-07 |
| Sh3yl1   | SH3 domain-containing YSC84-like protein 1                  | 114   | 98    | 569   | 432   | 1.1861E-05 | 5.28006E-07 |
| Fam110a  | protein FAM110A                                             | 908   | 958   | 555   | 692   | 1.1299E-05 | 5.31006E-07 |
| Bcap31   | B-cell receptor-associated protein 31, transcript variant 1 | 1298  | 1542  | 2627  | 2641  | 1.185E-05  | 5.55569E-07 |
| Zfp281   | zinc finger protein 281                                     | 784   | 974   | 592   | 630   | 1.2793E-05 | 6.11856E-07 |
| Cntnap2  | contactin associated protein 2                              | 9     | 4     | 46    | 50    | 1.3121E-05 | 6.21125E-07 |
| Mars2    | methionyl-tRNA synthetase, mitochondrial                    | 1030  | 1105  | 734   | 755   | 1.3365E-05 | 6.43618E-07 |
| Sc5d     | lathosterol oxidase                                         | 3407  | 4123  | 6482  | 7273  | 1.4078E-05 | 6.8331E-07  |
| CFH      | complement factor H                                         | 25    | 45    | 370   | 265   | 1.4587E-05 | 6.94935E-07 |
| Rras     | ras-related protein R-Ras                                   | 491   | 560   | 1253  | 1288  | 1.4655E-05 | 7.14933E-07 |
| ARF5     | ADP-ribosylation factor 5                                   | 1456  | 1615  | 2440  | 2522  | 1.6289E-05 | 7.20646E-07 |
| Tubal3   | tubulin, alpha 3                                            | 5     | 4     | 24    | 22    | 1.5976E-05 | 7.86883E-07 |
| Iifg3    | protein IIFG3                                               | 2439  | 2709  | 5655  | 5200  | 1.6207E-05 | 7.93712E-07 |
| Ckap4    | cytoskeleton-associated protein 4                           | 6092  | 6983  | 2887  | 4023  | 1.6416E-05 | 8.1092E-07  |
| Tmbim6   | bax inhibitor 1                                             | 6890  | 7989  | 12547 | 12351 | 1.7913E-05 | 8.4941E-07  |
| Slc16a1  | monocarboxylate transporter 1                               | 4778  | 6036  | 3171  | 3850  | 1.9026E-05 | 8.80675E-07 |
| PARP9    | poly [ADP-ribose] polymerase 9                              | 28    | 53    | 169   | 168   | 1.7678E-05 | 8.81382E-07 |
| Map11c3b | microtubule-associated proteins 1A/1B light chain 3B        | 2086  | 2639  | 5116  | 4584  | 1.9367E-05 | 9.04876E-07 |
| Cisd3    | CDGSH iron-sulfur domain-containing protein 3, mitochor     | 1511  | 1683  | 800   | 1032  | 1.8502E-05 | 9.28724E-07 |
| Mre11a   | meiotic recombination 11 homolog A                          | 1714  | 2041  | 632   | 721   | 2.0224E-05 | 9.45204E-07 |
| Harbi1   | putative nuclease HARBI1                                    | 36    | 48    | 137   | 124   | 1.9403E-05 | 9.81945E-07 |
| Orai3    | protein orai-3                                              | 297   | 302   | 463   | 546   | 2.129E-05  | 1.02782E-06 |
| Pcdhb3   | protocadherin beta-3                                        | 324   | 353   | 497   | 516   | 2.1019E-05 | 1.07342E-06 |
| Sema3e   | sema domain, immunoglobulin domain, short basic doma        | 1397  | 1705  | 4715  | 4464  | 2.3042E-05 | 1.10686E-06 |
| Zfp62    | zinc finger protein 62                                      | 196   | 236   | 367   | 325   | 2.2701E-05 | 1.17319E-06 |
| Tmem56   | transmembrane protein 56                                    | 10    | 15    | 94    | 72    | 2.4649E-05 | 1.29277E-06 |
| PLEKHF2  | pleckstrin homology domain-containing family F member       | 214   | 237   | 427   | 390   | 2.4955E-05 | 1.29533E-06 |
| Matn4    | matrilin 4, transcript variant 2                            | 2442  | 2729  | 1349  | 1537  | 2.5215E-05 | 1.30323E-06 |
| Matn4    | matrilin 4, transcript variant 1                            | 2442  | 2729  | 1349  | 1537  | 2.5215E-05 | 1.30339E-06 |
| Matn4    | matrilin 4, transcript variant 3                            | 2442  | 2729  | 1349  | 1537  | 2.5215E-05 | 1.30355E-06 |
| Matn4    | matrilin 4, transcript variant 4                            | 2442  | 2729  | 1349  | 1537  | 2.5215E-05 | 1.30362E-06 |
| HSPA1A   | heat shock 70 kDa protein 1A/1B                             | 294   | 295   | 144   | 208   | 2.4833E-05 | 1.30498E-06 |
| S100a1   | protein S100-A1                                             | 133   | 153   | 375   | 346   | 2.5273E-05 | 1.32301E-06 |
| HCFC1R1  | host cell factor C1 regulator 1, transcript variant 1       | 870   | 947   | 1561  | 1440  | 2.6523E-05 | 1.33021E-06 |
| Rcc1     | regulator of chromosome condensation                        | 578   | 597   | 311   | 348   | 2.6383E-05 | 1.39983E-06 |
| Dsel     | dermatan sulfate epimerase                                  | 209   | 303   | 451   | 391   | 2.6649E-05 | 1.41495E-06 |
| EXD1     | Exonuclease 3'-5' domain-containing protein 1               | 16    | 18    | 56    | 42    | 2.8106E-05 | 1.49826E-06 |
| ATOH8    | protein atonal homolog 8                                    | 19    | 21    | 2     | 5     | 2.9689E-05 | 1.59683E-06 |
| Gpr110   | G protein-coupled receptor 110                              | 33    | 34    | 272   | 316   | 3.5002E-05 | 1.67216E-06 |
| Rpsa     | 40S ribosomal protein SA                                    | 12763 | 14332 | 9601  | 10430 | 3.3234E-05 | 1.73859E-06 |
| Nucb2    | nucleobindin-2                                              | 1733  | 2096  | 3351  | 3330  | 3.6514E-05 | 1.79383E-06 |
| Atf5     | cyclic AMP-dependent transcription factor ATF-5             | 2959  | 2856  | 5519  | 4960  | 3.4487E-05 | 1.9053E-06  |
| Ldoc1l   | protein LDOC1L                                              | 69    | 64    | 128   | 121   | 3.5555E-05 | 1.96958E-06 |
| Sreb2    | Sreb2                                                       | 8809  | 9791  | 16075 | 16550 | 3.7186E-05 | 1.99101E-06 |
| Tsta3    | Tsta3                                                       | 817   | 943   | 1867  | 2031  | 3.7024E-05 | 2.03199E-06 |
| RRM2B    | ribonucleoside-diphosphate reductase subunit M2             | 4708  | 5694  | 1908  | 3039  | 4.0381E-05 | 2.05244E-06 |
| Apc2     | adenomatosis polyposis coli 2                               | 60    | 78    | 168   | 189   | 3.994E-05  | 2.25736E-06 |
| Dpm3     | Dpm3                                                        | 127   | 140   | 77    | 77    | 4.0137E-05 | 2.27104E-06 |
| Syne4    | nesprin-4, transcript variant 1                             | 33    | 36    | 282   | 201   | 4.2322E-05 | 2.28697E-06 |
| Syne4    | nesprin-4, transcript variant 2                             | 32    | 33    | 248   | 167   | 4.2323E-05 | 2.2873E-06  |
| Atxn7l3b | putative ataxin-7 protein 3B                                | 1464  | 1808  | 2571  | 2269  | 4.0903E-05 | 2.32262E-06 |
| Ppp1r3b  | protein phosphatase 1 regulatory subunit 3B                 | 60    | 72    | 136   | 113   | 4.6488E-05 | 2.69867E-06 |
| Ccni     | cyclin-I                                                    | 2645  | 3271  | 5750  | 5829  | 4.7044E-05 | 2.74019E-06 |
| Snx7     | sorting nexin 7                                             | 496   | 640   | 1155  | 1282  | 4.7742E-05 | 2.75071E-06 |
| Fth1     | ferritin heavy chain                                        | 3167  | 4041  | 2495  | 2761  | 5.1758E-05 | 3.0482E-06  |
| PPP1R14B | protein phosphatase 1 regulatory subunit 14B                | 5496  | 6374  | 3354  | 3940  | 5.4929E-05 | 3.25722E-06 |
| B4galt5  | B4galt5                                                     | 379   | 519   | 982   | 979   | 6.5256E-05 | 3.3462E-06  |
| PIGC     | phosphatidylinositol N-acetylglucosaminyltransferase sub    | 203   | 245   | 391   | 327   | 6.0631E-05 | 3.638E-06   |
| Tubg1    | tubulin gamma-1 chain                                       | 2726  | 3032  | 1306  | 1724  | 6.7473E-05 | 3.87486E-06 |
| Tomm5    | mitochondrial import receptor subunit TOM5 homolog          | 1175  | 1381  | 871   | 814   | 6.775E-05  | 4.11235E-06 |
| Arl1     | XR_136082.1                                                 | 793   | 986   | 1265  | 1240  | 6.8071E-05 | 4.14705E-06 |
| Msln     | mesothelin                                                  | 75    | 77    | 723   | 556   | 7.0812E-05 | 4.33168E-06 |
| Kifc2    | kinesin family member C2                                    | 6     | 8     | 59    | 50    | 7.0891E-05 | 4.34663E-06 |
| Nod2     | nucleotide-binding oligomerization domain containing 2      | 23    | 22    | 59    | 50    | 7.5213E-05 | 4.64876E-06 |

## Supplementary table 5 differentially expressed genes

|           |                                                            |       |       |       |       |            |             |
|-----------|------------------------------------------------------------|-------|-------|-------|-------|------------|-------------|
| Grcc10    | protein C10                                                | 1044  | 1180  | 1874  | 1858  | 7.5262E-05 | 4.65129E-06 |
| Slc39a1   | zinc transporter ZIP1                                      | 1904  | 2094  | 3295  | 3448  | 8.2955E-05 | 4.80606E-06 |
| PRCP      | lysosomal Pro-X carboxypeptidase                           | 726   | 869   | 1796  | 1692  | 8.7134E-05 | 4.82725E-06 |
| Ras10a    | ras protein family member 10A                              | 37    | 40    | 181   | 136   | 8.338E-05  | 4.94083E-06 |
| Fzd7      | frizzled-7                                                 | 1106  | 1215  | 1660  | 1607  | 7.9597E-05 | 4.96247E-06 |
| SBDS      | ribosome maturation protein SBDS                           | 566   | 714   | 1124  | 1127  | 8.4749E-05 | 5.03121E-06 |
| TMEM66    | transmembrane protein 66                                   | 1306  | 1615  | 2991  | 2740  | 8.4756E-05 | 5.05196E-06 |
| Naga      | alpha-N-acetylgalactosaminidase                            | 1179  | 1286  | 2445  | 2310  | 9.2353E-05 | 5.08187E-06 |
| Hist1h1b  | histone H1.5                                               | 9     | 18    | 41    | 37    | 8.1664E-05 | 5.11637E-06 |
| APBB2     | amyloid beta A4 precursor protein-binding family B memb    | 31    | 41    | 70    | 76    | 8.6992E-05 | 5.50869E-06 |
| Gnat1     | guanine nucleotide binding protein, alpha transducing 1    | 148   | 146   | 400   | 390   | 9.3562E-05 | 5.54181E-06 |
| Cyp51     | lanosterol 14-alpha demethylase                            | 7587  | 8777  | 15190 | 15354 | 9.2507E-05 | 5.54326E-06 |
| Rabac1    | PRA1 family protein 2                                      | 1091  | 1148  | 636   | 715   | 8.7608E-05 | 5.55157E-06 |
| SSU72     | RNA polymerase II subunit A C-terminal domain phosphat     | 273   | 312   | 702   | 667   | 8.9643E-05 | 5.66014E-06 |
| Vgf       | neurosecretory protein VGF                                 | 656   | 620   | 196   | 310   | 8.9389E-05 | 5.69627E-06 |
| Tuba1c    | tubulin alpha-1C chain                                     | 49834 | 56713 | 21105 | 31833 | 8.9771E-05 | 5.72207E-06 |
| Hprt1     | hypoxanthine-guanine phosphoribosyltransferase             | 1202  | 1703  | 3058  | 3105  | 9.1814E-05 | 5.8256E-06  |
| Naip2     | NLR family, apoptosis inhibitory protein 2                 | 6     | 8     | 26    | 25    | 0.00010023 | 6.51414E-06 |
| Lrrc59    | leucine-rich repeat-containing protein 59                  | 7246  | 8443  | 4171  | 5568  | 0.00012173 | 6.96467E-06 |
| Hmga1     | High mobility group protein HMG-I/HMG-Y                    | 1473  | 1376  | 666   | 953   | 0.00010734 | 6.99091E-06 |
| Zfp184    | Zinc Finger Protein 184 (Kruppel-Like)                     | 157   | 220   | 609   | 470   | 0.00010916 | 7.16832E-06 |
| Nfkbiz    | nuclear factor of kappa light polypeptide gene enhancer in | 13    | 10    | 74    | 56    | 0.00010988 | 7.23304E-06 |
| Slc25a20  | mitochondrial carnitine/acylcarnitine carrier protein      | 1327  | 1480  | 3110  | 2636  | 0.00011177 | 7.2772E-06  |
| Lmo2      | rhombotin-2                                                | 160   | 200   | 543   | 463   | 0.00011183 | 7.37678E-06 |
| Exph5     | exophilin 5                                                | 160   | 219   | 1038  | 1031  | 0.0001221  | 8.15275E-06 |
| HDHD3     | haloacid dehalogenase hydrolase domain-containing prot     | 16    | 24    | 43    | 55    | 0.00012327 | 8.24502E-06 |
| Syde1     | synapse defective 1, Rho GTPase, homolog 1 %28C. ele       | 889   | 921   | 309   | 337   | 0.00012672 | 8.45047E-06 |
| Aga       | n(4)-(beta-n-acetylglucosaminy)-l-asparaginase, transcrip  | 2495  | 2777  | 4649  | 4408  | 0.00012724 | 8.47244E-06 |
| Arsa      | arylsulfatase A                                            | 652   | 669   | 1811  | 1602  | 0.00012909 | 8.6716E-06  |
| Zbtb5     | zinc finger and BTB domain-containing protein 5            | 97    | 103   | 177   | 159   | 0.0001294  | 8.72453E-06 |
| Sepw1     | selenoprotein W                                            | 480   | 613   | 273   | 335   | 0.00013723 | 8.86947E-06 |
| ITGA3     | integrin alpha-3                                           | 1019  | 1065  | 3337  | 3692  | 0.00013501 | 8.98905E-06 |
| LIG4      | DNA ligase 4                                               | 303   | 407   | 223   | 250   | 0.00013294 | 9.01065E-06 |
| Cyb5r3    | NADH-cytochrome b5 reductase 3                             | 6009  | 6778  | 10899 | 10392 | 0.00014435 | 9.09954E-06 |
| Tigd2     | tigger transposable element-derived protein 2              | 278   | 337   | 450   | 445   | 0.00013501 | 9.16567E-06 |
| Fra-2     | fos-related antigen 2                                      | 313   | 341   | 885   | 737   | 0.00013768 | 9.38089E-06 |
| Rps2      | Rps2                                                       | 61611 | 64802 | 36225 | 45099 | 0.00014688 | 9.50832E-06 |
| Notum     | notum pectinacetyltransferase homolog %28Drosophila%29     | 6     | 8     | 34    | 22    | 0.0001403  | 9.59188E-06 |
| Tpbp      | trophoblast glycoprotein                                   | 918   | 1077  | 1271  | 1469  | 0.00014296 | 9.7953E-06  |
| Idi1      | isopentenyl-diphosphate Delta-isomerase 1                  | 2214  | 2816  | 6966  | 7995  | 0.00014442 | 9.91022E-06 |
| Clstn1    | calsyntenin 1                                              | 2739  | 3024  | 5520  | 5074  | 0.000172   | 1.02292E-05 |
| Ttll1     | tubulin polyglutamylase TTLL11                             | 2     | 4     | 23    | 14    | 0.00016343 | 1.14641E-05 |
| U2af2     | splicing factor U2AF 65 kDa subunit                        | 1127  | 1298  | 807   | 964   | 0.00016554 | 1.16333E-05 |
| UBE2C     | ubiquitin-conjugating enzyme E2 C                          | 3472  | 3840  | 1798  | 2524  | 0.00019065 | 1.1759E-05  |
| HIST1H2BN | histone H2B type 1-N                                       | 257   | 351   | 470   | 438   | 0.00016922 | 1.19346E-05 |
| Lcp1      | lymphocyte cytosolic protein 1                             | 12    | 13    | 126   | 96    | 0.00019503 | 1.26073E-05 |
| Zhx2      | zinc fingers and homeoboxes protein 2                      | 1404  | 1540  | 1941  | 2041  | 0.00018093 | 1.29429E-05 |
| INSIG2    | insulin-induced gene 2 protein                             | 52    | 53    | 89    | 102   | 0.00018569 | 1.33416E-05 |
| HNRNPM    | heterogeneous nuclear ribonucleoprotein M                  | 6692  | 7168  | 4033  | 5244  | 0.0002166  | 1.33549E-05 |
| HBP1      | HMG box-containing protein 1                               | 1216  | 1563  | 3058  | 2776  | 0.00018797 | 1.33986E-05 |
| TRAF7     | E3 ubiquitin-protein ligase TRAF7                          | 497   | 566   | 709   | 766   | 0.00018779 | 1.351E-05   |
| EPHX1     | epoxide hydrolase 1                                        | 5557  | 6254  | 12140 | 10660 | 0.00018878 | 1.36081E-05 |
| Eif2c2    | eukaryotic translation initiation factor 2C, 2             | 2577  | 3057  | 965   | 1271  | 0.00020237 | 1.36435E-05 |
| ZBTB26    | zinc finger and BTB domain-containing protein 26, transcr  | 101   | 128   | 184   | 180   | 0.00019828 | 1.43799E-05 |
| Dbil5     | Diazepam-binding inhibitor-like 5                          | 67    | 80    | 39    | 37    | 0.00019868 | 1.44155E-05 |
| ATP6V1F   | V-type proton ATPase subunit F                             | 980   | 1137  | 1549  | 1488  | 0.00021279 | 1.45228E-05 |
| Fam89b    | protein FAM89B, transcript variant 1                       | 1822  | 1833  | 1239  | 1327  | 0.0002159  | 1.47945E-05 |
| AGA       | N(4)-(beta-N-acetylglucosaminy)-L-asparaginase, transcr    | 2813  | 3281  | 5387  | 5090  | 0.00020489 | 1.48861E-05 |
| Ccdc85b   | coiled-coil domain-containing protein 85B                  | 4733  | 4280  | 2613  | 3369  | 0.00020646 | 1.50537E-05 |
| B4galt3   | B4galt3                                                    | 427   | 469   | 961   | 891   | 0.00024126 | 1.53335E-05 |
| Dgat2     | diacylglycerol O-acyltransferase 2                         | 194   | 199   | 676   | 612   | 0.00023722 | 1.59418E-05 |
| DLC1      | rho GTPase-activating protein 7, transcript variant 2      | 246   | 326   | 32    | 54    | 0.00024465 | 1.61725E-05 |
| DLC1      | rho GTPase-activating protein 7, transcript variant 1      | 317   | 407   | 46    | 73    | 0.00024469 | 1.61764E-05 |
| Olf1002   | olfactory receptor 1002                                    | 108   | 116   | 228   | 169   | 0.00022236 | 1.64022E-05 |
| Nit1      | nitrilase homolog 1                                        | 1005  | 1206  | 2166  | 1947  | 0.00025257 | 1.69806E-05 |
| Cyp4f14   | leukotriene-B4 omega-hydroxylase 3                         | 8     | 2     | 20    | 23    | 0.00023722 | 1.7695E-05  |
| Tmem176b  | transmembrane protein 176B                                 | 275   | 308   | 880   | 830   | 0.00024252 | 1.77622E-05 |
| Slc25a1   | tricarboxylate transport protein, mitochondrial            | 977   | 956   | 2193  | 2282  | 0.0002386  | 1.78101E-05 |
| Stc2      | stanniocalcin-2                                            | 701   | 778   | 1420  | 1311  | 0.00025655 | 1.84001E-05 |
| Sqstm1    | sequestosome 1                                             | 3270  | 3778  | 6726  | 5570  | 0.00028718 | 1.85635E-05 |

## Supplementary table 5 differentially expressed genes

|           |                                                                                |       |       |       |       |            |             |
|-----------|--------------------------------------------------------------------------------|-------|-------|-------|-------|------------|-------------|
| UBE2S     | ubiquitin-conjugating enzyme E2 S                                              | 7755  | 7996  | 4324  | 5937  | 0.00026928 | 1.91197E-05 |
| Hist1h1d  | histone H1.3                                                                   | 13    | 14    | 41    | 33    | 0.00026084 | 1.97234E-05 |
| Crebzf    | CREB/ATF bZIP transcription factor                                             | 488   | 578   | 815   | 725   | 0.00026232 | 1.98577E-05 |
| Tmem165   | transmembrane protein 165                                                      | 557   | 747   | 1095  | 1146  | 0.00029317 | 2.03828E-05 |
| Lrp10     | low-density lipoprotein receptor-related protein 10                            | 2837  | 3084  | 6692  | 6560  | 0.00030192 | 2.09937E-05 |
| Mtbp      | mdm2-binding protein                                                           | 1016  | 1099  | 622   | 722   | 0.00028407 | 2.14982E-05 |
| Rpsa      | Rpsa                                                                           | 43667 | 48300 | 32244 | 35354 | 0.00034791 | 2.15713E-05 |
| SH3BGRL   | SH3 domain-binding glutamic acid-rich-like protein                             | 4245  | 5563  | 8859  | 8050  | 0.00031182 | 2.21127E-05 |
| SH3BGRL3  | SH3 domain-binding glutamic acid-rich-likr protein 3                           | 701   | 747   | 354   | 503   | 0.0003197  | 2.3065E-05  |
| Pink1     | PTEN induced putative kinase 1                                                 | 536   | 495   | 1076  | 1065  | 0.00034217 | 2.37575E-05 |
| Stx11     | syntaxin-11                                                                    | 346   | 410   | 250   | 281   | 0.00030782 | 2.39967E-05 |
| Abtb2     | ankyrin repeat and BTB %28POZ%29 domain containing                             | 34    | 32    | 191   | 184   | 0.00032973 | 2.43931E-05 |
| Vamp5     | vesicle-associated membrane protein 5                                          | 42    | 35    | 123   | 119   | 0.00032563 | 2.56158E-05 |
| Zfp583    | zinc finger protein 583                                                        | 9     | 9     | 38    | 24    | 0.00035214 | 2.80995E-05 |
| Spry4     | protein sprouty homolog 4                                                      | 23    | 30    | 7     | 10    | 0.00036011 | 2.88734E-05 |
| PLD3      | phospholipase D3                                                               | 654   | 688   | 1650  | 1568  | 0.0004249  | 2.96557E-05 |
| Tspan6    | tetraspanin-6                                                                  | 1479  | 1925  | 2970  | 2747  | 0.00044984 | 3.10226E-05 |
| DHCR24    | delta(24)-sterol reductase                                                     | 5764  | 6378  | 9217  | 11093 | 0.00040667 | 3.13114E-05 |
| PSAT1     | phosphoserine aminotransferase                                                 | 919   | 1052  | 1488  | 1434  | 0.00039042 | 3.17083E-05 |
| Tmem176a  | transmembrane protein 176A                                                     | 195   | 187   | 658   | 563   | 0.00039591 | 3.18797E-05 |
| ELOVL7    | elongation of very long chain fatty acids protein 7                            | 349   | 440   | 895   | 899   | 0.00043687 | 3.22802E-05 |
| Rbm14     | RNA binding motif protein 14                                                   | 2147  | 2257  | 1128  | 1596  | 0.00044007 | 3.38796E-05 |
| Npas1     | neuronal PAS domain-containing protein 1                                       | 14    | 13    | 33    | 36    | 0.00042618 | 3.53687E-05 |
| Gata2     | GATA binding protein 2, transcript variant 2                                   | 490   | 556   | 230   | 267   | 0.00045609 | 3.56693E-05 |
| Ssr4      | translocon-associated protein subunit delta                                    | 1626  | 1969  | 2733  | 2654  | 0.00052176 | 3.63256E-05 |
| Glce      | glucuronyl C5-epimerase, transcript variant 1                                  | 466   | 630   | 920   | 989   | 0.00045402 | 3.81107E-05 |
| Glce      | glucuronyl C5-epimerase, transcript variant 2                                  | 466   | 630   | 920   | 989   | 0.00045419 | 3.8132E-05  |
| Ptgfrn    | prostaglandin F2 receptor negative regulator                                   | 7777  | 9302  | 12528 | 13011 | 0.00053395 | 3.81827E-05 |
| FAM89B    | protein FAM89B, transcript variant 2                                           | 945   | 896   | 571   | 631   | 0.00047432 | 3.84159E-05 |
| Letm2     | leucine zipper-EF-hand containing transmembrane protein                        | 11    | 7     | 28    | 27    | 0.00046135 | 3.88493E-05 |
| Asah1     | acid ceramidase                                                                | 1333  | 1607  | 2757  | 2623  | 0.00058623 | 4.01647E-05 |
| Ngef      | ephexin-1                                                                      | 26    | 21    | 6     | 7     | 0.00048834 | 4.15252E-05 |
| Plin4     | perilipin-4                                                                    | 750   | 663   | 3618  | 2826  | 0.00051986 | 4.20404E-05 |
| Mpv17     | mpv17 protein                                                                  | 40    | 34    | 121   | 117   | 0.00051924 | 4.33225E-05 |
| Cr1l      | complement regulatory protein Crry                                             | 1988  | 2365  | 3944  | 4232  | 0.00050791 | 4.33258E-05 |
| Agri      | agrin, transcript variant 1                                                    | 3292  | 3656  | 8468  | 8995  | 0.00052508 | 4.4421E-05  |
| Tspan3    | tetraspanin-3                                                                  | 4517  | 5551  | 7615  | 7759  | 0.00055938 | 4.61761E-05 |
| Eid1      | EP300-interacting inhibitor of differentiation 1                               | 1365  | 1534  | 1103  | 1053  | 0.00056599 | 4.9391E-05  |
| Sacs      | saccin                                                                         | 2133  | 2783  | 1201  | 1439  | 0.00057224 | 5.00778E-05 |
| STEAP1    | metalloreductase STEAP1                                                        | 585   | 694   | 1130  | 1074  | 0.00060153 | 5.03743E-05 |
| Zbtb7b    | zinc finger and BTB domain-containing protein 7B                               | 266   | 302   | 546   | 514   | 0.00059791 | 5.26791E-05 |
| Slc6a9    | sodium- and chloride-dependent glycine transporter 1                           | 403   | 417   | 1276  | 997   | 0.0006292  | 5.29272E-05 |
| Plk2      | serine/threonine-protein kinase PLK2                                           | 1097  | 1335  | 3154  | 2532  | 0.00062691 | 5.42339E-05 |
| Sept1     | septin-1                                                                       | 26    | 23    | 113   | 88    | 0.00066749 | 5.48339E-05 |
| Glis2     | GLIS family zinc finger 2                                                      | 868   | 990   | 433   | 497   | 0.00064818 | 5.55334E-05 |
| Sf3b5     | splicing factor 3B subunit 5                                                   | 2625  | 2552  | 1849  | 1949  | 0.00065187 | 5.81407E-05 |
| ARL2BP    | ADP-ribosylation factor protein 2-binding protein                              | 2835  | 3680  | 1288  | 1540  | 0.00074319 | 5.83278E-05 |
| GYPC      | glycophorin-C                                                                  | 152   | 177   | 104   | 112   | 0.00065384 | 5.83329E-05 |
| TRAF1     | TNF receptor-associated factor 1                                               | 260   | 328   | 67    | 101   | 0.00067416 | 6.00058E-05 |
| ABCF2     | ATP-binding cassette sub-family F member 2                                     | 1241  | 1411  | 923   | 1083  | 0.00069273 | 6.25048E-05 |
| Zbed4     | zinc finger, BED domain containing 4                                           | 458   | 550   | 348   | 389   | 0.00070265 | 6.3549E-05  |
| Zfp786    | zinc finger protein 786                                                        | 16    | 18    | 47    | 36    | 0.00071812 | 6.51368E-05 |
| Hist1h2bc | histone h2b type 1-c/e/g, transcript variant 2                                 | 337   | 446   | 567   | 538   | 0.00071876 | 6.52327E-05 |
| Tubb3     | tubulin beta-3 chain                                                           | 90    | 93    | 49    | 58    | 0.00072834 | 6.62141E-05 |
| Rptn      | repetin                                                                        | 15    | 4     | 49    | 28    | 0.00073008 | 6.64215E-05 |
| Pxmp3     | peroxisomal membrane protein 3                                                 | 55    | 80    | 102   | 125   | 0.00073947 | 6.74148E-05 |
| CCDC124   | coiled-coil domain-containing protein 124                                      | 2076  | 2194  | 1295  | 1586  | 0.00082877 | 6.74488E-05 |
| Rcbbt1    | regulator of chromosome condensation and BTB (POZ) domain containing protein 1 | 596   | 750   | 1464  | 1353  | 0.00089365 | 6.74606E-05 |
| Abhd4     | abhydrolase domain containing 4                                                | 955   | 1211  | 2750  | 2670  | 0.00076481 | 6.88955E-05 |
| Tmed4     | transmembrane emp24 domain-containing protein 4                                | 1365  | 1617  | 2508  | 2519  | 0.00084391 | 6.90719E-05 |
| Acp5      | acid phosphatase 5, tartrate resistant                                         | 96    | 92    | 327   | 254   | 0.00076473 | 7.01707E-05 |
| Ppp1r15a  | protein phosphatase 1 regulatory subunit 15A                                   | 884   | 1028  | 2031  | 1430  | 0.00077475 | 7.09119E-05 |
| GLTPD1    | glycolipid transfer protein domain-containing protein 1                        | 228   | 249   | 479   | 446   | 0.0008699  | 7.36847E-05 |
| Tex14     | testis-expressed protein 14                                                    | 3     | 4     | 22    | 13    | 0.00080466 | 7.46801E-05 |
| Gjb5      | gap junction beta-5 protein                                                    | 1481  | 1852  | 1003  | 1268  | 0.00082208 | 7.51512E-05 |
| Lmna      | prelamin-A/C, transcript variant 3                                             | 11136 | 11963 | 6695  | 8409  | 0.000898   | 7.54789E-05 |
| Ctsl      | cathepsin L1                                                                   | 5335  | 6788  | 10724 | 10573 | 0.00081566 | 7.58926E-05 |
| Il4i1     | interleukin 4 induced 1                                                        | 42    | 40    | 88    | 71    | 0.00083424 | 7.79938E-05 |
| Rprm      | protein reprimo                                                                | 205   | 246   | 294   | 357   | 0.0008419  | 7.88819E-05 |
| LTBP1     | latent-transforming growth factor beta-binding protein 1                       | 1045  | 1198  | 132   | 243   | 0.00096544 | 7.92429E-05 |

## Supplementary table 5 differentially expressed genes

|           |                                                           |       |       |       |       |            |             |
|-----------|-----------------------------------------------------------|-------|-------|-------|-------|------------|-------------|
| Lat2      | linker for activation of T-cells family member 2          | 6     | 8     | 21    | 24    | 0.00086234 | 8.10696E-05 |
| Lmna      | prelamin-A/C, transcript variant 2                        | 11422 | 12270 | 6875  | 8621  | 0.00099499 | 8.17298E-05 |
| Lmna      | prelamin-A/C, transcript variant 1                        | 11421 | 12269 | 6875  | 8620  | 0.00099508 | 8.17411E-05 |
| Csnk1g2   | casein kinase I isoform gamma-2                           | 2301  | 2248  | 3815  | 3965  | 0.0010665  | 8.25616E-05 |
| RGS16     | regulator of G-protein signaling 16                       | 46    | 31    | 115   | 116   | 0.00100004 | 8.37199E-05 |
| Ntn4      | netrin 4                                                  | 686   | 842   | 2192  | 2197  | 0.00093832 | 8.93703E-05 |
| HIST1H2BK | histone H2B type 1-K                                      | 683   | 886   | 1141  | 1085  | 0.00104077 | 9.04023E-05 |
| HMOX1     | heme oxygenase 1                                          | 2350  | 2932  | 1505  | 1935  | 0.00110301 | 9.22914E-05 |
| Cdh9      | cadherin 9                                                | 16    | 8     | 93    | 60    | 0.00097735 | 9.29591E-05 |
| Man2b2    | mannosidase 2, alpha B2, transcript variant 1             | 1187  | 1347  | 3079  | 2600  | 0.00117358 | 9.31545E-05 |
| Man2b2    | mannosidase 2, alpha B2, transcript variant 2             | 1102  | 1262  | 2838  | 2380  | 0.00118755 | 9.38436E-05 |
| HOXA9     | homeobox protein Hox-A9                                   | 33    | 52    | 104   | 70    | 0.00098103 | 9.42078E-05 |
| Man2b2    | mannosidase 2, alpha B2, transcript variant 3             | 1094  | 1256  | 2836  | 2370  | 0.00118976 | 9.43155E-05 |
| HECA      | headcase protein homolog                                  | 426   | 436   | 833   | 775   | 0.00102434 | 9.91322E-05 |
| Nmnat2    | nicotinamide nucleotide adenyltransferase 2               | 3     | 10    | 50    | 63    | 0.0010912  | 0.000106878 |
| Ulk3      | serine/threonine-protein kinase ULK3                      | 54    | 41    | 129   | 100   | 0.00114527 | 0.000107767 |
| Sesn2     | sestrin 2                                                 | 215   | 208   | 1079  | 786   | 0.00122483 | 0.000108308 |
| Serpinf1  | pigment epithelium-derived factor                         | 66    | 57    | 419   | 194   | 0.00111541 | 0.00010857  |
| Timm13    | mitochondrial import inner membrane translocase subunit   | 4061  | 4045  | 2610  | 2882  | 0.00123797 | 0.000108796 |
| Siae      | sialate O-acetyltransferase                               | 513   | 627   | 1363  | 1155  | 0.00130269 | 0.000109005 |
| Cyb5r3    | NADH-cytochrome b5 reductase                              | 6     | 7     | 23    | 20    | 0.0011262  | 0.000111093 |
| Neu1      | Neu1                                                      | 260   | 253   | 638   | 563   | 0.00115181 | 0.0001124   |
| Tgif1     | homeobox protein TGIF1, transcript variant 2              | 581   | 707   | 1049  | 985   | 0.00117229 | 0.00011471  |
| AVP11     | arginine vasopressin-induced protein 1                    | 583   | 564   | 1118  | 1189  | 0.0011594  | 0.000115058 |
| Zc2hc1c   | protein FAM164C                                           | 32    | 41    | 70    | 65    | 0.00116952 | 0.000116223 |
| Lsm3      | U6 snRNA-associated Sm protein LSm3                       | 1289  | 1569  | 785   | 1004  | 0.0013999  | 0.000119976 |
| Ssh3      | protein phosphatase Slingshot homolog 3                   | 213   | 206   | 856   | 876   | 0.00142401 | 0.00012016  |
| Nucb1     | nucleobindin-1                                            | 1391  | 1530  | 2597  | 2773  | 0.0012526  | 0.000121493 |
| CD59      | CD59 glycoprotein                                         | 546   | 703   | 1707  | 1659  | 0.00123131 | 0.000123513 |
| CDKN2C    | cyclin-dependent kinase 4 inhibitor C                     | 445   | 504   | 860   | 675   | 0.00123349 | 0.000123591 |
| Hspa5     | Hspa5                                                     | 26369 | 29756 | 45602 | 54440 | 0.00134928 | 0.000124178 |
| Irs2      | insulin receptor substrate 2                              | 249   | 236   | 388   | 431   | 0.00124007 | 0.000124368 |
| Pcna      | Pcna                                                      | 6596  | 8794  | 3697  | 5165  | 0.00125413 | 0.000124602 |
| Ncs1      | neuronal calcium sensor 1                                 | 276   | 270   | 89    | 96    | 0.00136629 | 0.000125637 |
| wrb       | tryptophan-rich protein                                   | 887   | 1008  | 449   | 493   | 0.00126903 | 0.000127857 |
| Ngf       | beta-nerve growth factor                                  | 38    | 44    | 18    | 20    | 0.00127137 | 0.000128222 |
| JRK       | jerky protein homolog                                     | 172   | 210   | 263   | 282   | 0.00127994 | 0.00012932  |
| Gata2     | GATA binding protein 2, transcript variant 1              | 509   | 580   | 250   | 289   | 0.0014247  | 0.000132026 |
| Mybl2     | myeloblastosis oncogene 2                                 | 8632  | 9297  | 4548  | 6425  | 0.00155843 | 0.000136209 |
| Wdtdc1    | WD and tetratricopeptide repeats 1                        | 1005  | 1146  | 2186  | 2174  | 0.00155727 | 0.000142834 |
| Lrrc8b    | leucine rich repeat containing 8 family, member B         | 396   | 468   | 897   | 905   | 0.00142667 | 0.000145476 |
| CRIP2     | hydrogen peroxide-induced mRNA                            | 3233  | 4272  | 7877  | 5382  | 0.00151863 | 0.000145488 |
| Txnip     | thioredoxin-interacting protein                           | 1457  | 1644  | 2969  | 2450  | 0.00170978 | 0.000146538 |
| FUS       | RNA-binding protein FUS                                   | 12413 | 13254 | 7068  | 8707  | 0.00166968 | 0.000147489 |
| PCDHB5    | protocadherin beta-5                                      | 68    | 92    | 134   | 123   | 0.00145206 | 0.000150336 |
| Lpar6     | lysophosphatidic acid receptor 6                          | 139   | 183   | 257   | 224   | 0.00147021 | 0.000152541 |
| Arhgap32  | rho GTPase-activating protein 8                           | 34    | 33    | 133   | 118   | 0.001587   | 0.000157923 |
| sdh       | probable saccharopine dehydrogenase                       | 586   | 730   | 1441  | 1262  | 0.00174836 | 0.000158274 |
| Acs14     | long-chain-fatty-acid-CoA ligase 4                        | 1835  | 2353  | 3775  | 3755  | 0.00180792 | 0.000164443 |
| HERC6     | probable E3 ubiquitin-protein ligase HERC6                | 135   | 141   | 91    | 89    | 0.0016391  | 0.00017347  |
| Fam187a   | Ig V-type domain-containing protein FAM187A               | 40    | 29    | 81    | 62    | 0.00164345 | 0.000174071 |
| MARCH9    | E3 ubiquitin-protein ligase MARCH9                        | 748   | 626   | 851   | 912   | 0.00173499 | 0.000175949 |
| Dbp       | D site-binding protein                                    | 79    | 93    | 211   | 170   | 0.00170058 | 0.000181526 |
| Etl4      | enhancer trap locus 4                                     | 4     | 11    | 21    | 25    | 0.00174293 | 0.000186908 |
| Gjb3      | gap junction beta-3 protein                               | 1855  | 2158  | 1037  | 1609  | 0.00194531 | 0.000187191 |
| Fzd4      | frizzled-4                                                | 192   | 224   | 90    | 105   | 0.00180533 | 0.000195122 |
| Mesdc2    | LDLR chaperone MESD                                       | 2875  | 3410  | 4498  | 4655  | 0.00191699 | 0.000209491 |
| Nppb      | natriuretic peptides B                                    | 208   | 267   | 65    | 141   | 0.00215349 | 0.000211215 |
| Fam101b   | protein FAM101B                                           | 987   | 1056  | 460   | 587   | 0.00194108 | 0.000212931 |
| Pgrmc1    | membrane-associated progesterone receptor component       | 1366  | 1612  | 2303  | 2231  | 0.00197481 | 0.000217464 |
| Nxt1      | NTF2-related export protein 1, transcript variant 2       | 448   | 513   | 342   | 378   | 0.00198522 | 0.000219281 |
| Lepre1    | prolyl 3-hydroxylase 1                                    | 990   | 1117  | 2743  | 2471  | 0.00200732 | 0.000220129 |
| Bbs12     | Bardet-Biedl syndrome 12 protein homolog                  | 114   | 156   | 188   | 208   | 0.00201328 | 0.000223136 |
| Litaf     | lipopolysaccharide-induced tumor necrosis factor-alpha fa | 2108  | 2431  | 3457  | 3283  | 0.00222031 | 0.000233036 |
| Zfp90     | zinc finger protein 90                                    | 1     | 8     | 16    | 19    | 0.00215638 | 0.000243073 |
| Dnase111  | Dnase111                                                  | 58    | 74    | 212   | 191   | 0.00239726 | 0.000249472 |
| Tardbp    | TAR DNA-binding protein 43, transcript variant 2          | 2739  | 3255  | 1989  | 2165  | 0.00261979 | 0.000250178 |
| Kpnb1     | karyopherin %28importin%29 beta 1                         | 19329 | 22843 | 12091 | 14597 | 0.00227177 | 0.000254855 |
| Fam198b   | protein FAM198B                                           | 464   | 686   | 267   | 277   | 0.00241035 | 0.000259557 |
| Nxt1      | NTF2-related export protein 1, transcript variant 1       | 498   | 555   | 363   | 394   | 0.00252563 | 0.000261043 |

**Supplementary table 5** differentially expressed genes

|          |                                                                 |       |       |       |       |            |             |
|----------|-----------------------------------------------------------------|-------|-------|-------|-------|------------|-------------|
| Tardbp   | TAR DNA-binding protein 43, transcript variant 3                | 2552  | 3058  | 1856  | 2011  | 0.00275646 | 0.000261535 |
| Pcdhb7   | protocadherin beta-7                                            | 116   | 129   | 173   | 187   | 0.0023261  | 0.000267295 |
| Plch2    | phospholipase C, eta 2                                          | 8     | 7     | 28    | 19    | 0.00233064 | 0.000267937 |
| S1pr2    | sphingosine-1-phosphate receptor 2                              | 2129  | 2428  | 1756  | 1863  | 0.00237866 | 0.000274227 |
| ACAT2    | acetyl-CoA acetyltransferase, cytosolic                         | 8300  | 9297  | 19959 | 22112 | 0.00241408 | 0.000278981 |
| Efh2     | EF-hand domain-containing protein D2                            | 3764  | 4371  | 2082  | 2799  | 0.00273699 | 0.000286674 |
| Hmgb1    | high mobility group protein B1                                  | 10461 | 12400 | 7169  | 8864  | 0.00292183 | 0.000293188 |
| Tmem123  | poririn                                                         | 424   | 565   | 876   | 832   | 0.00256186 | 0.000300266 |
| Ccne1    | G1/S-specific cyclin-E1                                         | 683   | 923   | 386   | 414   | 0.00297414 | 0.000301156 |
| Tardbp   | TAR DNA-binding protein 43, transcript variant 1                | 4912  | 5875  | 3543  | 3922  | 0.00316527 | 0.000301329 |
| Jrk      | jerky protein                                                   | 150   | 170   | 217   | 239   | 0.00256989 | 0.000301482 |
| Egr2     | early growth response protein 2                                 | 49    | 44    | 77    | 84    | 0.00264455 | 0.000312381 |
| Spry1    | protein sprouty homolog 1                                       | 31    | 10    | 55    | 55    | 0.00268204 | 0.000317659 |
| Pycr1    | pyrroline-5-carboxylate reductase 1, mitochondrial              | 264   | 256   | 618   | 548   | 0.00313009 | 0.000329608 |
| Hmgn1    | non-histone chromosomal protein HMG-14                          | 2260  | 2503  | 1363  | 1699  | 0.00279242 | 0.000332178 |
| Atp6v0d1 | ATPase, H <sup>+</sup> 2B transporting, lysosomal V0 subunit D1 | 1465  | 1565  | 2722  | 2540  | 0.00297173 | 0.000333479 |
| Myom3    | myomesin family, member 3                                       | 1     | 9     | 26    | 15    | 0.00279301 | 0.000333747 |
| Pcdhb10  | protocadherin beta-10                                           | 131   | 166   | 202   | 223   | 0.00279612 | 0.000334286 |
| Stbd1    | starch-binding domain-containing protein 1                      | 77    | 76    | 161   | 109   | 0.00282248 | 0.00033811  |
| Eif6     | eukaryotic translation initiation factor 6                      | 7512  | 8561  | 4623  | 5630  | 0.00302739 | 0.000348622 |
| Zmat4    | zinc finger matrin-type protein 4                               | 14    | 12    | 49    | 51    | 0.00291633 | 0.000352083 |
| Chmp2b   | charged multivesicular body protein 2b                          | 767   | 1135  | 1637  | 1711  | 0.00353306 | 0.000355321 |
| P2ry2    | purinergic receptor P2Y, G-protein coupled 2                    | 268   | 326   | 222   | 204   | 0.00296607 | 0.000359126 |
| Atf3     | cyclic AMP-dependent transcription factor ATF-3                 | 27    | 41    | 108   | 105   | 0.00301506 | 0.000362156 |
| Wdr89    | WD repeat-containing protein 89                                 | 196   | 225   | 130   | 165   | 0.0030037  | 0.000364654 |
| Fth1     | ferritin heavy chain 1                                          | 27027 | 31880 | 19571 | 21809 | 0.00303567 | 0.000366637 |
| Ugp2     | Ugp2                                                            | 748   | 977   | 1910  | 1724  | 0.00322029 | 0.000367851 |
| Cd151    | CD151 antigen                                                   | 3701  | 4276  | 6055  | 6570  | 0.00334699 | 0.000368867 |
| Chac1    | cation transport regulator protein 1                            | 30    | 38    | 104   | 76    | 0.00306472 | 0.000369539 |
| AOC1     | amiloride-sensitive amine oxidase [copper-containing]           | 297   | 339   | 82    | 88    | 0.00311429 | 0.000369647 |
| Mpz13    | myelin protein zero-like protein 3                              | 4     | 5     | 14    | 19    | 0.00307822 | 0.000375417 |
| Bambi    | BMP and activin membrane-bound inhibitor homolog                | 234   | 263   | 152   | 171   | 0.00350799 | 0.00037891  |
| Psph     | phosphoserine phosphatase                                       | 1230  | 1469  | 2163  | 2121  | 0.00363501 | 0.000383428 |
| Ncl      | nucleolin                                                       | 34877 | 40275 | 24054 | 28132 | 0.00401578 | 0.000385404 |
| Klhl9    | kelch protein 9                                                 | 1422  | 1810  | 2098  | 2077  | 0.00318778 | 0.000391834 |
| MOAP1    | modulator of apoptosis 1                                        | 422   | 489   | 678   | 582   | 0.00332093 | 0.000411567 |
| Atpif1   | ATPase inhibitor, mitochondrial                                 | 1069  | 1125  | 1717  | 1976  | 0.00339322 | 0.000413749 |
| Aftph    | aftiphilin                                                      | 755   | 910   | 1971  | 1752  | 0.00372576 | 0.000417077 |
| Ghitm    | growth hormone-inducible transmembrane protein                  | 6998  | 8574  | 14047 | 13325 | 0.00340564 | 0.00042447  |
| Elavl2   | ELAV like neuron-specific RNA binding protein 2, transcri       | 121   | 179   | 36    | 45    | 0.00386763 | 0.000427911 |
| Setmar   | histone-lysine N-methyltransferase SETMAR                       | 58    | 58    | 120   | 86    | 0.00343738 | 0.000429394 |
| Elavl2   | ELAV like neuron-specific RNA binding protein 2, transcri       | 142   | 200   | 41    | 48    | 0.00390403 | 0.000430077 |
| Spsb2    | SPRY domain-containing SOCS box protein 2                       | 181   | 191   | 276   | 299   | 0.00396477 | 0.000439111 |
| Carns1   | carnosine synthase 1                                            | 133   | 142   | 350   | 354   | 0.00352722 | 0.00044246  |
| Cdc6     | cell division cycle 6 homolog %28S. cerevisiae%29               | 983   | 1124  | 402   | 564   | 0.00424166 | 0.000443635 |
| Spry2    | protein sprouty homolog 2                                       | 239   | 270   | 372   | 336   | 0.00356529 | 0.000449016 |
| C1qtnf2  | complement C1q tumor necrosis factor-related protein 2          | 37    | 30    | 13    | 16    | 0.00360228 | 0.000454566 |
| Bscl2    | seipin                                                          | 59    | 82    | 372   | 289   | 0.00435118 | 0.000483863 |
| Bola1    | bolA protein 1                                                  | 445   | 435   | 324   | 323   | 0.00383378 | 0.000490178 |
| Enox2    | ecto-NOX disulfide-thiol exchanger 2                            | 7     | 6     | 18    | 21    | 0.00391219 | 0.000502002 |
| Ccrn4l   | nocturnin                                                       | 1078  | 1262  | 1777  | 1807  | 0.00396848 | 0.000510759 |
| Txn14a   | thioredoxin protein 4A                                          | 628   | 764   | 508   | 569   | 0.00398213 | 0.000512978 |
| Ranbp1   | ran-specific GTPase-activating protein                          | 4329  | 5120  | 2689  | 3363  | 0.00403813 | 0.000521323 |
| Tmem126b | transmembrane protein 126B                                      | 699   | 861   | 1260  | 1213  | 0.00472092 | 0.000524539 |
| Zeb1     | zinc finger E-box-binding homeobox 2                            | 1097  | 1391  | 421   | 390   | 0.00407377 | 0.000525423 |
| Smyd1    | SET and MYND domain containing 1                                | 13    | 21    | 74    | 96    | 0.00468402 | 0.000528919 |
| NPC2     | epididymal secretory protein E1                                 | 5041  | 5994  | 8543  | 8320  | 0.00433196 | 0.000548202 |
| Smpd1    | sphingomyelin phosphodiesterase 1, acid lysosomal               | 2150  | 2256  | 3175  | 3241  | 0.00504119 | 0.000550531 |
| Ifitm2   | interferon-induced transmembrane protein 2                      | 12337 | 14215 | 17398 | 17376 | 0.00487605 | 0.000551305 |
| Zmiz2    | zinc finger, MIZ-type containing 2, transcript variant 1        | 750   | 781   | 1789  | 1800  | 0.00538312 | 0.000569226 |
| Gbgt1    | globoside alpha-1,3-N-acetylgalactosaminyltransferase 1         | 50    | 83    | 157   | 146   | 0.00439199 | 0.000577603 |
| Tlr1     | toll-like receptor 1                                            | 38    | 32    | 80    | 57    | 0.00443696 | 0.000585046 |
| Pnpla2   | patatin phospholipase domain containing 2, transcript var       | 497   | 529   | 1415  | 1339  | 0.00460366 | 0.000593075 |
| Pnpla2   | patatin phospholipase domain containing 2, transcript var       | 572   | 608   | 1627  | 1553  | 0.00464289 | 0.000596102 |
| Zmiz2    | zinc finger, MIZ-type containing 2, transcript variant 2        | 740   | 766   | 1766  | 1771  | 0.00571433 | 0.000596467 |
| Elavl2   | ELAV like neuron-specific RNA binding protein 2, transcri       | 47    | 79    | 16    | 19    | 0.00551867 | 0.00060304  |
| Sfxn1    | sideroflexin 1                                                  | 6884  | 8285  | 3800  | 4313  | 0.00483112 | 0.000617672 |
| Phf21b   | PHD finger protein 21B                                          | 343   | 373   | 82    | 88    | 0.0047024  | 0.000624196 |
| Gpr146   | probable G-protein coupled receptor 146                         | 18    | 15    | 34    | 36    | 0.00470293 | 0.000628857 |
| St3gal1  | CMP-N-acetylneuraminic acid-6-sulfate-4-epimerase               | 336   | 413   | 174   | 183   | 0.00545776 | 0.000680074 |

## Supplementary table 5

## differentially expressed genes

|           |                                                                               |       |       |       |       |            |             |
|-----------|-------------------------------------------------------------------------------|-------|-------|-------|-------|------------|-------------|
| Eif4a1    | eukaryotic initiation factor 4A-I                                             | 3916  | 4753  | 3271  | 3711  | 0.00509992 | 0.000693066 |
| Mob3b     | mps one binder kinase activator-like 2B                                       | 116   | 146   | 220   | 203   | 0.00540231 | 0.000693212 |
| Ndfip1    | NEDD4 family-interacting protein 1                                            | 1212  | 1501  | 2361  | 2259  | 0.0057728  | 0.000694325 |
| Pcdhb18   | protocadherin beta-18                                                         | 116   | 141   | 171   | 195   | 0.00512223 | 0.000696753 |
| Akap2     | A kinase %28PRKA%29 anchor protein 2                                          | 1036  | 1144  | 448   | 473   | 0.00562945 | 0.000700668 |
| Zfp397    | zinc finger protein 397                                                       | 31    | 31    | 76    | 66    | 0.00577528 | 0.000701719 |
| Bnip3     | BCL2/adenovirus E1B 19 kDa protein-interacting protein 3                      | 1545  | 2012  | 2850  | 3250  | 0.00599641 | 0.000713566 |
| Thbs3     | thrombospondin 3                                                              | 919   | 966   | 2258  | 2023  | 0.00700224 | 0.000717498 |
| Tmem63a   | transmembrane protein 63a                                                     | 177   | 179   | 931   | 822   | 0.00626082 | 0.00072228  |
| Zfp260    | zinc finger protein 260                                                       | 353   | 462   | 624   | 514   | 0.00548418 | 0.000756277 |
| Per3      | period circadian protein homolog 3                                            | 72    | 72    | 139   | 124   | 0.00591185 | 0.00077814  |
| Tbc1d10c  | TBC1 domain family, member 10c                                                | 50    | 39    | 185   | 200   | 0.00668949 | 0.000796199 |
| Ninj2     | ninjurin-2                                                                    | 32    | 24    | 84    | 76    | 0.00653478 | 0.000813623 |
| Kpna2     | karyopherin %28importin%29 alpha 2                                            | 6821  | 8452  | 4264  | 5777  | 0.00702429 | 0.000823428 |
| Serinc3   | serine incorporator 3                                                         | 1608  | 1921  | 3336  | 3051  | 0.00616781 | 0.000844609 |
| Cebpd     | CCAAT/enhancer-binding protein delta                                          | 192   | 165   | 250   | 268   | 0.00601371 | 0.000847057 |
| Tnfaip8l1 | tumor necrosis factor alpha-induced protein 8-like protein 1                  | 44    | 46    | 22    | 26    | 0.0062704  | 0.000891598 |
| Birc5     | baculoviral IAP repeat-containing protein 5                                   | 402   | 479   | 253   | 319   | 0.00630545 | 0.000895119 |
| Rwdd3     | RWD domain-containing protein 3                                               | 18    | 33    | 70    | 58    | 0.00704395 | 0.000899893 |
| Ssbp2     | single-stranded DNA binding protein 2                                         | 30    | 30    | 57    | 51    | 0.00635069 | 0.000906423 |
| Tpt1      | translationally-controlled tumor protein                                      | 3777  | 4502  | 5631  | 5458  | 0.00656186 | 0.000911745 |
| Lpl       | Lpl                                                                           | 4728  | 5926  | 9521  | 8063  | 0.00795686 | 0.000916867 |
| Samd12    | sterile alpha motif domain-containing protein 12                              | 56    | 50    | 228   | 173   | 0.00679603 | 0.000920453 |
| Klhl38    | kelch 38 %28Drosophila%29                                                     | 36    | 27    | 63    | 55    | 0.00647309 | 0.000929074 |
| Arf3      | ADP-ribosylation factor 3                                                     | 1787  | 2038  | 2864  | 2788  | 0.00672617 | 0.00093926  |
| Rcc1      | regulator of chromosome condensation, transcript variant 1                    | 3355  | 3749  | 1729  | 2154  | 0.00682236 | 0.000944697 |
| Rcc1      | regulator of chromosome condensation, transcript variant 2                    | 3355  | 3749  | 1729  | 2154  | 0.00682287 | 0.000944715 |
| Rcc1      | regulator of chromosome condensation, transcript variant 3                    | 3355  | 3749  | 1729  | 2154  | 0.00682277 | 0.000944797 |
| Ccdc71    | coiled-coil domain-containing protein 71                                      | 546   | 570   | 842   | 702   | 0.00660141 | 0.00095199  |
| Sat1      | spermidine/spermine N1-acetyltransferase                                      | 1030  | 1337  | 2115  | 2000  | 0.00746864 | 0.000957674 |
| FCGBP     | IgGFC-binding protein                                                         | 19    | 19    | 4     | 9     | 0.00673489 | 0.000976287 |
| Tmem30a   | transmembrane protein 30A                                                     | 1244  | 1710  | 2703  | 2702  | 0.00801923 | 0.000990482 |
| Zcchc24   | zinc finger CCHC domain-containing protein 24                                 | 547   | 659   | 212   | 273   | 0.00756081 | 0.000998351 |
| Dnajb4    | DnaJ %28Hsp40%29 homolog, subfamily B, member 4                               | 242   | 324   | 582   | 487   | 0.0069016  | 0.001005761 |
| Ctla2b    | protein CTLA-2-beta                                                           | 2885  | 3851  | 6557  | 6171  | 0.00693159 | 0.001012199 |
| Carhsp1   | calcium-regulated heat stable protein 1                                       | 972   | 986   | 1752  | 1962  | 0.00720835 | 0.001031937 |
| Slc45a1   | solute carrier family 45, member 1                                            | 613   | 579   | 1196  | 1134  | 0.0070447  | 0.001032717 |
| Nudt12    | nudix %28nucleoside diphosphate linked moiety X%29-type 12                    | 127   | 150   | 428   | 289   | 0.00744672 | 0.001037568 |
| Lpcat3    | lysophospholipid acyltransferase 5                                            | 2362  | 2506  | 3875  | 3833  | 0.00780066 | 0.001043163 |
| Cntm4     | CKLF-like MARVEL transmembrane domain-containing protein 4                    | 97    | 126   | 197   | 221   | 0.00749399 | 0.001050263 |
| Gpr6      | G-protein coupled receptor 6                                                  | 17    | 20    | 6     | 7     | 0.00717083 | 0.001055665 |
| Fcrr2a    | low affinity immunoglobulin epsilon Fc receptor, transcript variant 2         | 23    | 22    | 41    | 44    | 0.00719191 | 0.001059688 |
| Pdlim2    | PDZ and LIM domain protein 2, transcript variant 1                            | 17    | 11    | 53    | 38    | 0.00755469 | 0.00106991  |
| H2afz     | histone H2A.Z                                                                 | 3215  | 3708  | 2046  | 2865  | 0.00818859 | 0.001084165 |
| Neu2      | Neu2                                                                          | 881   | 1032  | 544   | 639   | 0.00737445 | 0.001091859 |
| Ppp1r18   | phostensin                                                                    | 1547  | 1558  | 662   | 853   | 0.00744793 | 0.001105632 |
| Ppp1cb    | serine/threonine-protein phosphatase PP1-beta catalytic subunit               | 3452  | 4726  | 5909  | 5757  | 0.00982116 | 0.001123172 |
| Igfbp4    | insulin growth factor-binding protein 4                                       | 4419  | 4100  | 2404  | 3121  | 0.00786211 | 0.001126872 |
| KTI12     | protein KTI12 homolog                                                         | 1219  | 1269  | 949   | 1023  | 0.00759457 | 0.0011337   |
| MyI12b    | myosin regulatory light chain 12B                                             | 11199 | 12975 | 15795 | 16442 | 0.00771435 | 0.001147843 |
| S100a3    | protein S100-A3                                                               | 79    | 83    | 32    | 47    | 0.00861951 | 0.00116898  |
| Evpl      | envoplakin                                                                    | 31    | 36    | 63    | 54    | 0.00781799 | 0.001174753 |
| Hoxa4     | homeobox protein Hox-A4                                                       | 64    | 76    | 126   | 97    | 0.00788582 | 0.001187425 |
| Plcg1     | 1-phosphatidylinositol-4,5-bisphosphate phosphodiesterase gamma               | 5550  | 6335  | 2053  | 2275  | 0.00902531 | 0.001192292 |
| Ugt1a1    | UDP glucuronosyltransferase 1 family, polypeptide A1                          | 36    | 53    | 115   | 96    | 0.00823103 | 0.001199228 |
| Cyr61     | cysteine rich protein 61                                                      | 421   | 554   | 203   | 275   | 0.00817434 | 0.001203213 |
| Lrrn3     | leucine rich repeat protein 3, neuronal                                       | 10    | 5     | 19    | 22    | 0.00799494 | 0.001207699 |
| Ebp       | 3-beta-hydroxysteroid-Delta(8),Delta(7)-isomerase                             | 1681  | 1862  | 3563  | 3969  | 0.00811885 | 0.001228517 |
| Srm       | spermidine synthase                                                           | 2698  | 2828  | 1690  | 1955  | 0.0089982  | 0.001232508 |
| Zrsr1     | zinc finger (CCCH type), RNA-binding motif and serine/threonine phosphatase 1 | 12    | 26    | 37    | 39    | 0.00813369 | 0.001234684 |
| Olfml3    | olfactomedin 3                                                                | 489   | 553   | 273   | 283   | 0.00897491 | 0.001244295 |
| Ppargc1b  | peroxisome proliferator-activated receptor gamma coactivator 1 beta           | 89    | 109   | 35    | 54    | 0.00822489 | 0.001250643 |
| Eif5a2    | eukaryotic translation initiation factor 5A-2                                 | 1121  | 1454  | 556   | 656   | 0.00930434 | 0.001259527 |
| Plin2     | perilipin-2                                                                   | 4346  | 5511  | 7328  | 6841  | 0.01052075 | 0.001264061 |
| Tnfrsf12a | tumor necrosis factor receptor superfamily member 12A, type I                 | 5261  | 5829  | 3747  | 4247  | 0.00839772 | 0.001275089 |
| Znhit3    | zinc finger HIT domain-containing protein 2                                   | 527   | 499   | 384   | 388   | 0.00844466 | 0.001292463 |
| Mxd4      | max dimerization protein 4                                                    | 190   | 208   | 416   | 329   | 0.00854272 | 0.001294245 |
| Gpr39     | G protein-coupled receptor 39                                                 | 87    | 93    | 162   | 153   | 0.00855852 | 0.001296521 |
| Klhl24    | kelch-like protein 24                                                         | 257   | 331   | 640   | 550   | 0.01047383 | 0.001318916 |
| Cdt1      | Cdt1                                                                          | 1424  | 1548  | 627   | 935   | 0.00995113 | 0.001330762 |

## Supplementary table 5 differentially expressed genes

|          |                                                           |       |       |       |       |            |             |
|----------|-----------------------------------------------------------|-------|-------|-------|-------|------------|-------------|
| Mdh1b    | malate dehydrogenase 1B, NAD %28soluble%29                | 8     | 14    | 37    | 21    | 0.00871829 | 0.001343919 |
| C1qtnf1  | complement C1q tumor necrosis factor-related protein 1    | 13    | 20    | 33    | 34    | 0.00878858 | 0.001356627 |
| Ppp1r15b | protein phosphatase 1, regulatory subunit 15b             | 1083  | 1280  | 1630  | 1568  | 0.00906154 | 0.001358218 |
| Gcsh     | glycine cleavage system H protein, mitochondrial          | 2046  | 2710  | 1376  | 1675  | 0.01009944 | 0.001372991 |
| ZMYND12  | zinc finger MYND domain-containing protein 12             | 66    | 85    | 268   | 204   | 0.01129847 | 0.001417398 |
| Sfpq     | splicing factor proline glutamine rich                    | 5119  | 6052  | 3463  | 4309  | 0.01139042 | 0.001446818 |
| Fn1      | fibronectin 1, transcript variant 3                       | 5209  | 5837  | 2480  | 2802  | 0.01309203 | 0.001461424 |
| Fn1      | fibronectin 1, transcript variant 2                       | 5948  | 6625  | 2862  | 3206  | 0.01309285 | 0.001461546 |
| Isg15    | ubiquitin protein ISG15                                   | 11    | 6     | 18    | 27    | 0.00958472 | 0.00151152  |
| Ly96     | lymphocyte antigen 96                                     | 7     | 13    | 32    | 20    | 0.00959202 | 0.001512999 |
| Timp1    | metalloproteinase inhibitor 1                             | 1212  | 1387  | 1961  | 1884  | 0.01129551 | 0.001517382 |
| Tes      | testin, transcript variant 1                              | 765   | 826   | 1189  | 1320  | 0.01179943 | 0.001521392 |
| C1ra     | complement component 1, r subcomponent A                  | 4548  | 4832  | 8216  | 6880  | 0.01213336 | 0.001535125 |
| IFNGR2   | interferon gamma receptor 2                               | 371   | 428   | 649   | 714   | 0.01144134 | 0.001541428 |
| Inha     | inhibin alpha chain                                       | 76    | 85    | 185   | 123   | 0.01051495 | 0.00154786  |
| Necap1   | adaptin ear-binding coat-associated protein 1             | 1173  | 1389  | 2619  | 2414  | 0.01087053 | 0.00156088  |
| TRAPPC4  | trafficking protein particle complex subunit 4            | 995   | 1092  | 1556  | 1534  | 0.01245371 | 0.001578526 |
| Gpt2     | alanine aminotransferase 2                                | 654   | 727   | 1908  | 1609  | 0.01017019 | 0.001604526 |
| Pmf1     | polyamine-modulated factor 1                              | 418   | 467   | 168   | 239   | 0.01038296 | 0.001608924 |
| Psap     | prosaposin                                                | 10359 | 12346 | 16862 | 15817 | 0.01316497 | 0.001622112 |
| P4ha3    | proline 4-hydroxylase alpha polypeptide III               | 1112  | 1379  | 2007  | 1820  | 0.01083379 | 0.001626624 |
| Rap2a    | ras-related protein Rap-2a                                | 134   | 175   | 99    | 119   | 0.01019078 | 0.001631225 |
| Mroh7    | HEAT repeat-containing protein 8                          | 208   | 159   | 106   | 135   | 0.01019449 | 0.001631907 |
| Mis18a   | protein Mis18-alpha                                       | 435   | 430   | 217   | 273   | 0.0124269  | 0.001648873 |
| NUDT22   | nucleoside diphosphate-linked moiety X motif 22           | 275   | 330   | 551   | 524   | 0.01199079 | 0.001654985 |
| PTRF     | polymerase I and transcript release factor                | 5950  | 5885  | 3749  | 5036  | 0.01121105 | 0.001660984 |
| KCTD17   | BTB/POZ domain-containing protein KCTD17                  | 569   | 608   | 943   | 963   | 0.01332212 | 0.001684833 |
| Ahcy     | S-adenosylhomocysteine hydrolase                          | 5548  | 6305  | 3497  | 4197  | 0.01246462 | 0.001686966 |
| Snx18    | sorting nexin 18                                          | 1046  | 1235  | 1612  | 1455  | 0.01180014 | 0.001710996 |
| Gmpr     | GMP reductase 1                                           | 6     | 5     | 18    | 15    | 0.0106901  | 0.001731638 |
| Ak3      | GTP:AMP phosphotransferase, mitochondrial                 | 3724  | 4547  | 2898  | 2835  | 0.01236413 | 0.001732727 |
| Ran      | GTP-binding nuclear protein Ran                           | 16233 | 19080 | 11313 | 13641 | 0.0109118  | 0.001742897 |
| S100a6   | protein S100-A6                                           | 9996  | 12658 | 14487 | 14483 | 0.01133629 | 0.001746289 |
| Klhl38   | kelch protein 38                                          | 37    | 26    | 60    | 55    | 0.01077556 | 0.001748418 |
| Nisch    | nischarin                                                 | 2204  | 2472  | 4688  | 4688  | 0.01542556 | 0.001762723 |
| AK2      | adenylate kinase 2, mitochondrial                         | 1010  | 1171  | 784   | 839   | 0.01133259 | 0.00182263  |
| Arl4d    | ADP-ribosylation factor protein 4D                        | 497   | 493   | 276   | 306   | 0.01156919 | 0.001822639 |
| PDLIM2   | PDZ and LIM domain protein 2, transcript variant 2        | 17    | 12    | 53    | 38    | 0.01148455 | 0.00182332  |
| Acbd4    | acyl-CoA-binding domain-containing protein 4              | 269   | 271   | 725   | 633   | 0.01482264 | 0.001848291 |
| Il6st    | interleukin 6 signal transducer                           | 2314  | 2908  | 4606  | 3953  | 0.01457435 | 0.001855353 |
| MAGEA10  | melanoma-associated antigen 10                            | 62    | 93    | 136   | 106   | 0.01132796 | 0.001862265 |
| PIN1     | peptidyl-prolyl cis-trans isomerase NIMA-interacting 1    | 2270  | 2409  | 1572  | 1839  | 0.01192611 | 0.001892979 |
| Cbfb     | core-binding factor subunit beta                          | 573   | 669   | 373   | 462   | 0.01434918 | 0.001893983 |
| Cacnb3   | voltage-dependent L-type calcium channel subunit beta-3   | 447   | 383   | 796   | 900   | 0.01427398 | 0.001903902 |
| Btg3     | protein BTG3                                              | 314   | 366   | 555   | 574   | 0.01211682 | 0.001957607 |
| Spsb1    | SPRY domain-containing SOCS box protein 1                 | 129   | 165   | 65    | 96    | 0.01194119 | 0.001961974 |
| Mfsd3    | major facilitator superfamily domain-containing protein 3 | 159   | 161   | 354   | 332   | 0.01353268 | 0.001962469 |
| Slc10a3  | solute carrier family 10, member 3                        | 128   | 151   | 213   | 208   | 0.01372201 | 0.00200297  |
| Unc80    | unc-80 homolog %28C. elegans%29                           | 6     | 5     | 19    | 14    | 0.01224368 | 0.002044923 |
| Dpf3     | zinc finger protein DPF3                                  | 22    | 27    | 10    | 12    | 0.0124038  | 0.002078217 |
| Wnt4     | protein Wnt-4                                             | 83    | 74    | 18    | 33    | 0.01311708 | 0.002078351 |
| ICAM4    | intercellular adhesion molecule 4                         | 110   | 101   | 220   | 189   | 0.01399419 | 0.002123164 |
| Slc9a9   | solute carrier family 9, member 9                         | 77    | 69    | 318   | 210   | 0.01723286 | 0.002136666 |
| Canx     | Canx                                                      | 7168  | 8736  | 11314 | 12207 | 0.01406941 | 0.002148506 |
| Fn1      | fibronectin 1, transcript variant 1                       | 6036  | 6710  | 2918  | 3256  | 0.01825553 | 0.002164768 |
| Mars     | methionyl-tRNA synthetase, cytoplasmic, transcript variar | 1320  | 1436  | 3005  | 2662  | 0.01664264 | 0.00219758  |
| Ccdc65   | coiled-coil domain containing 65                          | 10    | 10    | 26    | 21    | 0.01302639 | 0.00221014  |
| ZNRF4    | zinc/RING finger protein 4                                | 8     | 16    | 24    | 29    | 0.01305691 | 0.002217669 |
| Hsp90aa1 | heat shock protein HSP 90-alpha                           | 4064  | 5499  | 2943  | 3653  | 0.01394005 | 0.002253923 |
| Acbd6    | acyl-CoA-binding domain-containing protein 6              | 1220  | 1408  | 2020  | 1938  | 0.01686487 | 0.002266331 |
| Mcm3     | minichromosome maintenance deficient 3 (S. cerevisiae)    | 6709  | 7323  | 3459  | 4906  | 0.01517393 | 0.002279982 |
| Dhx32    | DEAH (Asp-Glu-Ala-His) box polypeptide 32                 | 1377  | 1624  | 2703  | 2414  | 0.01667468 | 0.002291971 |
| SMAGP    | small cell adhesion glycoprotein                          | 698   | 779   | 999   | 1018  | 0.01380411 | 0.002295224 |
| Gpc1     | glypican-1                                                | 7447  | 8089  | 4455  | 5974  | 0.01729541 | 0.002304698 |
| Fgd4     | FYVE, RhoGEF and PH domain containing 4                   | 16    | 30    | 90    | 81    | 0.01348667 | 0.00230481  |
| Chchd4   | mitochondrial intermembrane space import and assembly     | 982   | 1169  | 749   | 816   | 0.0143086  | 0.002304843 |
| Thra     | thyroid hormone receptor alpha, transcript variant 3      | 520   | 637   | 980   | 974   | 0.01786444 | 0.002307427 |
| Klf10    | Kruppel factor 10                                         | 254   | 308   | 132   | 148   | 0.01369653 | 0.002310994 |
| Dclk1    | doublecortin kinase 1, transcript variant 3               | 44    | 64    | 20    | 21    | 0.01372885 | 0.002320156 |
| Dclk1    | doublecortin kinase 1, transcript variant 5               | 44    | 64    | 20    | 21    | 0.01373008 | 0.002320587 |



## Supplementary table 5 differentially expressed genes

|           |                                                           |       |       |       |       |            |             |
|-----------|-----------------------------------------------------------|-------|-------|-------|-------|------------|-------------|
| Dclk1     | doublecortin kinase 1, transcript variant 1               | 44    | 64    | 20    | 21    | 0.0137317  | 0.002320989 |
| Hsd17b13  | 17-beta-hydroxysteroid dehydrogenase 13, transcript vari  | 13    | 6     | 38    | 19    | 0.01354675 | 0.002323941 |
| Thra      | thyroid hormone receptor alpha, transcript variant 2      | 585   | 693   | 1057  | 1054  | 0.01815813 | 0.002335865 |
| Csrp3     | cysteine and glycine-rich protein 3                       | 6     | 4     | 11    | 21    | 0.01360753 | 0.00233599  |
| Dhodh     | dihydroorotate dehydrogenase                              | 1260  | 1369  | 619   | 720   | 0.01496917 | 0.002359572 |
| Hsbp1     | heat shock factor-binding protein 1                       | 849   | 1023  | 1338  | 1371  | 0.01400797 | 0.002371987 |
| Hspd1     | heat shock protein 1 (chaperonin)                         | 25600 | 31901 | 19212 | 22909 | 0.01750702 | 0.002382029 |
| Leprot    | leptin receptor gene-related protein                      | 852   | 934   | 1320  | 1384  | 0.01430211 | 0.002389843 |
| NPM1      | nucleophosmin                                             | 12887 | 17507 | 9784  | 10952 | 0.01747348 | 0.002392243 |
| Asl       | argininosuccinate lyase, transcript variant 1             | 6     | 10    | 21    | 19    | 0.01393968 | 0.002410743 |
| Asl       | argininosuccinate lyase, transcript variant 2             | 6     | 10    | 21    | 19    | 0.01393968 | 0.00241082  |
| Asl       | argininosuccinate lyase, transcript variant 3             | 6     | 10    | 21    | 19    | 0.0139408  | 0.002411133 |
| Nudt18    | nucleoside diphosphate-linked moiety X motif 18           | 143   | 183   | 319   | 304   | 0.01421932 | 0.002423357 |
| C1GALT1C1 | C1GALT1-specific chaperone 1                              | 529   | 762   | 851   | 831   | 0.0141055  | 0.002447668 |
| Yme111    | YME1 1 %28S. cerevisiae%29                                | 2656  | 3424  | 5281  | 5032  | 0.01690346 | 0.002503219 |
| Cpeb3     | cytoplasmic polyadenylation element-binding protein 3     | 72    | 71    | 191   | 203   | 0.01475277 | 0.002504474 |
| Gstm1     | glutathione S-transferase Y1                              | 3560  | 3711  | 6052  | 5997  | 0.01440388 | 0.002512159 |
| RMI1      | recQ-mediated genome instability protein 2                | 379   | 443   | 183   | 264   | 0.01442332 | 0.002518899 |
| Pa2g4     | proliferation-associated protein 2G4                      | 11112 | 13506 | 7618  | 8526  | 0.01665787 | 0.00255865  |
| Lym2      | LYR motif-containing protein 2                            | 219   | 273   | 382   | 328   | 0.01680181 | 0.002590455 |
| Pcdhgb1   | protocadherin gamma-B1                                    | 432   | 498   | 590   | 591   | 0.01475642 | 0.002593044 |
| Zfp703    | zinc finger protein 703                                   | 594   | 614   | 744   | 797   | 0.01483864 | 0.002611536 |
| Npc1      | Npc1                                                      | 1298  | 1633  | 430   | 504   | 0.01781096 | 0.002618717 |
| FBXO5     | F-box only protein 5                                      | 680   | 840   | 400   | 496   | 0.01661937 | 0.002620872 |
| NSDHL     | sterol-4-alpha-carboxylate 3-dehydrogenase, decarboxyla   | 1586  | 1732  | 3902  | 4162  | 0.01501997 | 0.002652145 |
| Vamp2     | vesicle-associated membrane protein 2                     | 73    | 96    | 164   | 153   | 0.01626355 | 0.002661919 |
| St14      | suppression of tumorigenicity 14 %28colon carcinoma%2     | 140   | 151   | 587   | 582   | 0.0175425  | 0.002665497 |
| Thra      | thyroid hormone receptor alpha                            | 133   | 171   | 277   | 269   | 0.01620227 | 0.002672554 |
| Abhd15    | abhydrolase domain containing 15                          | 9     | 12    | 21    | 26    | 0.01524948 | 0.002704103 |
| MKRN1     | E3 ubiquitin-protein ligase makorin-1                     | 642   | 832   | 1274  | 1387  | 0.01543741 | 0.002722521 |
| Tubb2c    | Tubb2c                                                    | 13663 | 16492 | 8406  | 12942 | 0.01761611 | 0.002735484 |
| Slc35a4   | probable UDP-sugar transporter protein SLC35A4            | 406   | 430   | 308   | 346   | 0.01540735 | 0.002741046 |
| Flot2     | flotillin-2, transcript variant 1                         | 1491  | 1726  | 3247  | 3187  | 0.01564604 | 0.002751712 |
| Kdelr3    | ER lumen protein retaining receptor 3                     | 972   | 1236  | 1557  | 1534  | 0.01669157 | 0.002755904 |
| Nuak1     | NUAK family, SNF1 kinase, 1                               | 79    | 95    | 53    | 64    | 0.01551782 | 0.002766093 |
| Dcakd     | dephospho-CoA kinase domain-containing protein            | 3327  | 3428  | 2415  | 2613  | 0.01775606 | 0.002796697 |
| Bean1     | protein BEAN1                                             | 50    | 46    | 11    | 20    | 0.01570224 | 0.002803092 |
| MED7      | mediator of RNA polymerase II transcription subunit 7     | 140   | 154   | 222   | 188   | 0.01569163 | 0.002806564 |
| Ror1      | receptor tyrosine kinase orphan receptor 1                | 298   | 323   | 609   | 634   | 0.01891184 | 0.002811494 |
| FBXO36    | F-box only protein 36                                     | 8     | 4     | 21    | 14    | 0.01574245 | 0.00281981  |
| Lypla1    | lysophospholipase protein 1                               | 222   | 243   | 557   | 432   | 0.01686573 | 0.002855485 |
| PDIA6     | protein disulfide-isomerase A6                            | 12228 | 13749 | 17213 | 19723 | 0.01966186 | 0.002859223 |
| H2-K1     | h-2 class I histocompatibility antigen, K-B alpha chain   | 2037  | 2253  | 2887  | 2798  | 0.01819456 | 0.002874971 |
| UBIAD1    | ubiA prenyltransferase domain-containing protein 1        | 956   | 1076  | 718   | 778   | 0.0160818  | 0.002893231 |
| FBXW2     | F-box/WD repeat-containing protein 2                      | 1277  | 1565  | 2224  | 2221  | 0.0176598  | 0.002898057 |
| Cpne9     | copine-9                                                  | 17    | 24    | 7     | 10    | 0.01612891 | 0.002906265 |
| Ttf2      | transcription termination factor, RNA polymerase II       | 1535  | 1666  | 470   | 580   | 0.02123392 | 0.002921505 |
| Cct5      | T-complex protein 1 subunit epsilon, transcript variant 1 | 13144 | 15916 | 9826  | 10853 | 0.01826783 | 0.002946097 |
| Cct5      | T-complex protein 1 subunit epsilon, transcript variant 2 | 13087 | 15868 | 9793  | 10827 | 0.01826811 | 0.002946198 |
| Zfp664    | zinc finger protein 664                                   | 573   | 657   | 827   | 751   | 0.0163952  | 0.002971362 |
| Lpin1     | Lpin1                                                     | 60    | 67    | 299   | 260   | 0.02053121 | 0.003004127 |
| Sox8      | SRY-box containing gene 8                                 | 25    | 29    | 8     | 17    | 0.01656305 | 0.003011373 |
| NUDT6     | nucleoside diphosphate-linked moiety X motif 6            | 13    | 20    | 51    | 44    | 0.01886758 | 0.003098061 |
| STAR      | steroidogenic acute regulatory protein, mitochondrial     | 29    | 26    | 11    | 15    | 0.01699219 | 0.003112264 |
| FAM43A    | protein FAM43A                                            | 146   | 164   | 214   | 205   | 0.01713602 | 0.003146883 |
| Il25      | interleukin-25                                            | 37    | 26    | 74    | 74    | 0.01793304 | 0.003149048 |
| Abcc5     | ATP-binding cassette, sub-family C %28CFTR%2FMRP%         | 205   | 307   | 406   | 419   | 0.0217757  | 0.003151615 |
| CPN1      | carboxypeptidase N catalytic chain                        | 19    | 15    | 8     | 4     | 0.01722748 | 0.003169444 |
| Cdkn1a    | cyclin-dependent kinase inhibitor 1A                      | 922   | 1143  | 1771  | 1949  | 0.01736181 | 0.003198245 |
| Flot2     | flotillin-2, transcript variant 2                         | 1442  | 1689  | 3169  | 3083  | 0.01775088 | 0.003227982 |
| RHNO1     | RAD9, RAD1, HUS1-interacting nuclear orphan protein       | 927   | 1124  | 731   | 843   | 0.01928115 | 0.0032378   |
| Ccdc125   | coiled-coil domain containing 125                         | 29    | 37    | 52    | 56    | 0.01763231 | 0.003263597 |
| Igsf9     | immunoglobulin superfamily, member 9                      | 5     | 6     | 15    | 16    | 0.01769291 | 0.003280087 |
| RASSF8    | Ras association (RaGDS/AF-6) domain family (N-termina     | 1368  | 1567  | 749   | 911   | 0.01844105 | 0.003321208 |
| SDR39U1   | epimerase family protein SDR39U1                          | 30    | 29    | 45    | 56    | 0.01785598 | 0.003322626 |
| Slc52a3   | riboflavin transporter 2, transcript variant 1            | 1008  | 1126  | 1578  | 1731  | 0.01824432 | 0.003367642 |
| Hmgb2     | high mobility group protein B2                            | 2001  | 2573  | 1608  | 1920  | 0.02243802 | 0.003386717 |
| Slc52a3   | riboflavin transporter 2, transcript variant 2            | 316   | 359   | 537   | 564   | 0.01946463 | 0.003502996 |
| Gtdc1     | glycosyltransferase domain containing 1                   | 79    | 95    | 294   | 273   | 0.02331567 | 0.003570124 |
| THOC2     | THO complex subunit 2                                     | 312   | 403   | 477   | 446   | 0.0189749  | 0.003590285 |

**Supplementary table 5**      differentially expressed genes

|          |                                                           |       |       |       |       |            |             |
|----------|-----------------------------------------------------------|-------|-------|-------|-------|------------|-------------|
| P2RY1    | P2Y purinoceptor 1                                        | 25    | 28    | 12    | 14    | 0.01909482 | 0.003619503 |
| Man2b1   | mannosidase 2, alpha B1                                   | 815   | 912   | 2344  | 1905  | 0.02510188 | 0.003670868 |
| Gstt2    | glutathione S-transferase theta-2                         | 218   | 240   | 501   | 409   | 0.02402471 | 0.003692539 |
| Pawr     | PRKC apoptosis WT1 regulator protein                      | 649   | 808   | 1460  | 1366  | 0.02054557 | 0.003695032 |
| Slc25a45 | solute carrier family 25 member 45                        | 56    | 59    | 151   | 115   | 0.02098641 | 0.003752367 |
| Gba      | glucosidase, beta, acid                                   | 745   | 866   | 1689  | 1406  | 0.02246967 | 0.003791812 |
| RDH14    | retinol dehydrogenase 14                                  | 232   | 237   | 415   | 393   | 0.01989474 | 0.0038137   |
| Gdpd5    | glycerophosphodiester phosphodiesterase domain-contai     | 66    | 65    | 15    | 33    | 0.02367562 | 0.003841916 |
| B3GALT4  | beta-1,3-galactosyltransferase 4                          | 120   | 127   | 90    | 87    | 0.02009618 | 0.003860674 |
| CCNG1    | cyclin-G1                                                 | 1018  | 1529  | 2250  | 2222  | 0.02181768 | 0.003864484 |
| Elovl4   | elongation of very long chain fatty acids protein 4       | 80    | 86    | 27    | 20    | 0.02245484 | 0.003876768 |
| Ets2     | protein C-ets-2                                           | 560   | 596   | 1201  | 1153  | 0.02038062 | 0.003881701 |
| Egr1     | early growth response protein 1                           | 703   | 838   | 1027  | 928   | 0.02022275 | 0.003891189 |
| Ruvbl1   | ruvB-like 1                                               | 5176  | 5853  | 3625  | 4282  | 0.02813478 | 0.003977484 |
| Slc44a1  | solute carrier family 44, member 1                        | 1687  | 2031  | 3964  | 3989  | 0.02242711 | 0.004069666 |
| Sdhaf2   | succinate dehydrogenase assembly factor 2, mitochondrial  | 1795  | 2075  | 3048  | 2648  | 0.02470619 | 0.004130444 |
| DUSP3    | dual specificity protein phosphatase 3                    | 112   | 148   | 208   | 194   | 0.02315778 | 0.004197392 |
| Lfng     | beta-1,3-N-acetylglucosaminyltransferase lunatic fringe   | 81    | 86    | 17    | 23    | 0.02663447 | 0.004267248 |
| Srrt     | Srrt                                                      | 1806  | 2041  | 1087  | 1435  | 0.02564637 | 0.004321652 |
| Jup      | junction plakoglobin                                      | 24    | 27    | 175   | 150   | 0.02257496 | 0.004356574 |
| Iscu     | iron-sulfur cluster assembly enzyme ISCU, mitochondrial   | 790   | 857   | 1162  | 1191  | 0.02810241 | 0.004414211 |
| Acot6    | acyl-CoA thioesterase 6                                   | 209   | 172   | 260   | 272   | 0.02239378 | 0.004414214 |
| Ccdc103  | coiled-coil domain-containing protein 103                 | 47    | 45    | 97    | 98    | 0.02732748 | 0.004418284 |
| Srsf1    | serine%2Farginine-rich splicing factor 1                  | 7063  | 8513  | 6054  | 6319  | 0.02271358 | 0.004457982 |
| Rgs17    | regulator of G-protein signaling 17                       | 156   | 210   | 582   | 627   | 0.02430943 | 0.004501825 |
| C3AR1    | C3a anaphylatoxin chemotactic receptor                    | 168   | 208   | 144   | 138   | 0.02286143 | 0.004531708 |
| Scn9a    | sodium channel, voltage-gated, type IX, alpha, transcript | 9     | 21    | 34    | 28    | 0.02286851 | 0.004533925 |
| Scn9a    | sodium channel, voltage-gated, type IX, alpha, transcript | 9     | 21    | 34    | 28    | 0.02286851 | 0.00453428  |
| Scn9a    | sodium channel, voltage-gated, type IX, alpha, transcript | 9     | 21    | 34    | 28    | 0.02286911 | 0.004534594 |
| Pfn1     | profilin-1                                                | 5765  | 6153  | 4452  | 5178  | 0.02570081 | 0.004567645 |
| Chml     | rab proteins geranylgeranyltransferase component A 2      | 614   | 779   | 889   | 853   | 0.02311595 | 0.004597321 |
| Sfrp4    | secreted frizzled-related protein 4                       | 215   | 274   | 510   | 469   | 0.02757309 | 0.004611507 |
| NME1     | nucleoside diphosphate kinase A, transcript variant 1     | 4906  | 5710  | 3747  | 4043  | 0.02673851 | 0.004618504 |
| Myo1g    | myosin IG                                                 | 19    | 15    | 7     | 6     | 0.02372201 | 0.004757735 |
| Pex11g   | peroxisomal membrane protein 11C                          | 38    | 50    | 116   | 104   | 0.0273361  | 0.004770121 |
| Mrps6    | 28S ribosomal protein S6, mitochondrial                   | 284   | 317   | 206   | 221   | 0.0261912  | 0.004770574 |
| BATF2    | basic leucine zipper transcriptional factor ATF-like 2    | 48    | 62    | 87    | 78    | 0.02381448 | 0.004782895 |
| Ipo5     | importin-5                                                | 10587 | 13145 | 6696  | 7980  | 0.03125941 | 0.004826275 |
| RAD18    | E3 ubiquitin-protein ligase RAD18                         | 247   | 322   | 185   | 246   | 0.024116   | 0.004861026 |
| Utp14b   | UTP14, U3 small nucleolar ribonucleoprotein, homolog B    | 369   | 417   | 508   | 542   | 0.02764347 | 0.004869939 |
| Klhl36   | kelch 36 %28Drosophila%29                                 | 139   | 151   | 231   | 251   | 0.02495169 | 0.004893445 |
| Gtpbp2   | GTP binding protein 2                                     | 256   | 300   | 728   | 589   | 0.0304197  | 0.004894468 |
| Mpp1     | membrane protein, palmitoylated                           | 1067  | 1311  | 2160  | 2093  | 0.02670118 | 0.004916644 |
| Pcbp2    | poly(rC)-binding protein 2                                | 5959  | 6626  | 4958  | 5458  | 0.02762111 | 0.004925782 |
| MUM1L1   | PWWP domain-containing protein MUM1L1                     | 1109  | 1397  | 990   | 1104  | 0.02531172 | 0.004927341 |
| Rps15    | 40S ribosomal protein S15                                 | 15312 | 16742 | 10551 | 11669 | 0.02555552 | 0.004934378 |
| Zfand3   | AN1-type zinc finger protein 3                            | 424   | 533   | 763   | 717   | 0.03253863 | 0.005071467 |
